# Supplementary material
Source: PubMed Central journal article supplement (PMC7935770)
Supplement: NIHMS1658032-supplement-1.pdf [file NIHMS1658032-supplement-1.pdf]

**R-2-hydroxyglutarate attenuates aerobic glycolysis in leukemia by targeting the  
FTO/m<sup>6</sup>A/PFKP/LDHB axis**

Ying Qing, Lei Dong, Lei Gao, Chenying Li, Yangchan Li, Li Han, Emily Prince, Brandon Tan, Xiaolan Deng, Collin Wetzel, Chao Shen, Min Gao, Zhenhua Chen, Wei Li, Bin Zhang, Daniel Braas, Johanna ten Hoeve, Gerardo Javier Sanchez, Huiying Chen, Lai N. Chan, Chun-Wei Chen, David Ann, Lei Jiang, Markus Müschen, Guido Marcucci, David R. Plas, Zejuan Li, Rui Su, Jianjun Chen

**Supplemental Information:**

**I. Supplemental Figures**

Figure S1 (related to Figure 1)

Figure S2 (related to Figure 2)

Figure S3 (related to Figure 3)

Figure S4 (related to Figure 4)

Figure S5 (related to Figure 5)

Figure S6 (related to Figure 6)

Figure S7 (related to Figure 7)

**II. Supplemental Tables**

Table S1 (related to Figure 1). Metabolite levels in NOMO-1 cells treated with PBS or R-2HG

Table S2 (related to Figure 1). Metabolite levels in NB4 cells treated with PBS or R-2HG

Table S3 (related to Figure S1). Metabolite levels in NOMO-1 IDH1<sup>R132H</sup> cells treated with PBS or doxycycline

Table S4 (related to Figure 3). Metabolite levels in NOMO-1 cells stably expressing shNS or shFTO-2

Table S5 (related to Figure 4). List of the 35 glycolysis- and gluconeogenesis-related genes.

Table S6 (related to Figures 7 and S7). Information of the AML patient samples used in the study.

Table S7 (related to Star Methods). List of oligonucleotides

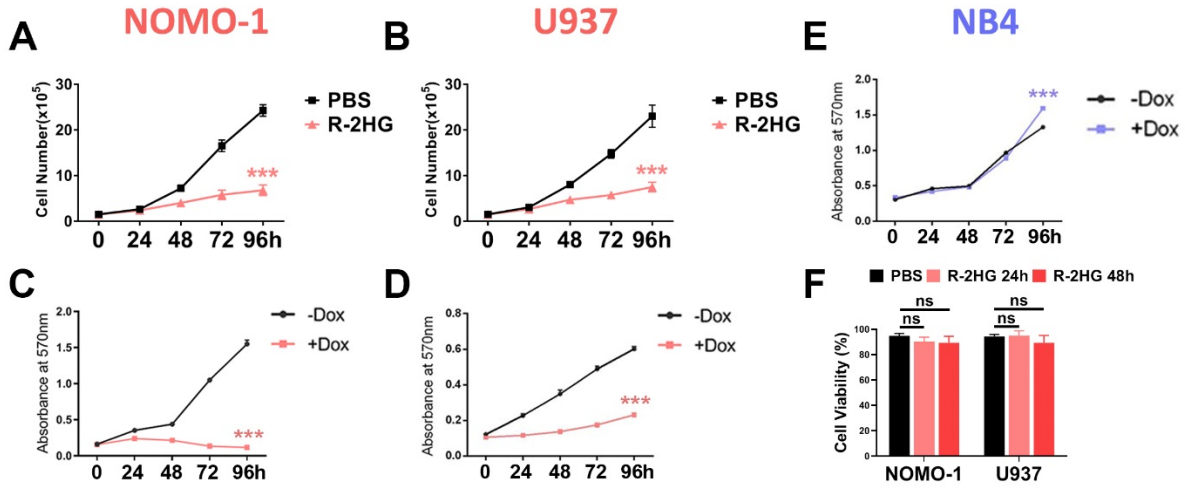

**IDH1<sup>R132H</sup> expression validation**

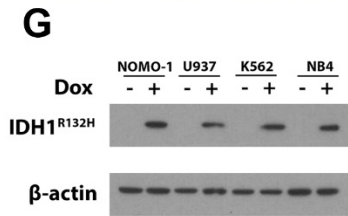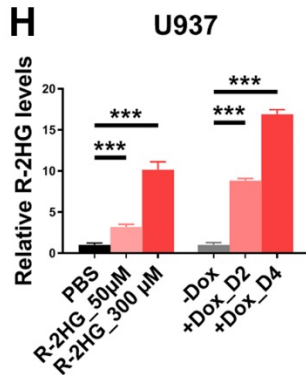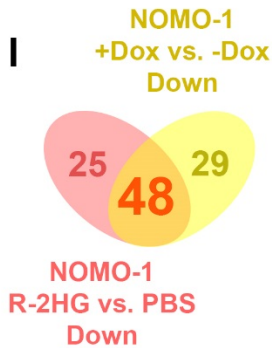

**J NOMO-1**

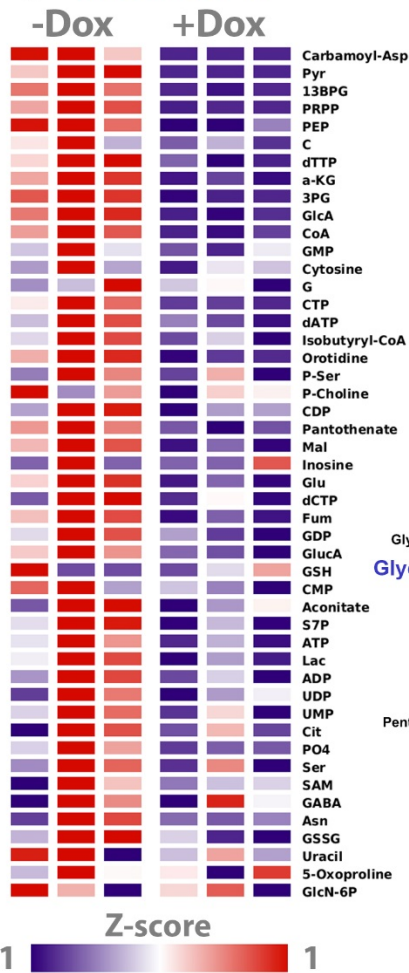

**K**

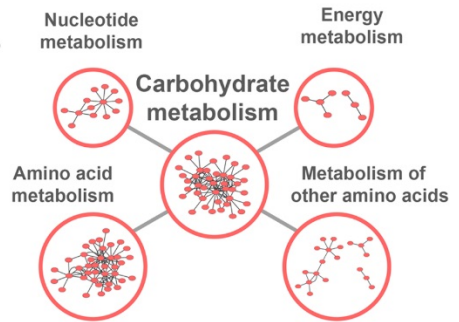

**L**

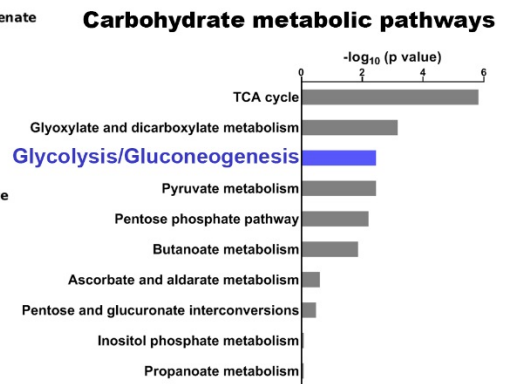

**Figure S1 (related to Figure 1). Effects of exogenous and endogenous R-2HG on proliferation and cellular metabolism in leukemia cells**

(A and B) Effects of exogenous R-2HG on cell proliferation/growth in R-2HG-sensitive NOMO-1 (A) and U937 (B) cells as determined by cell counting. 300  $\mu$ M R-2HG were added to cell culture media at 0 h. The p values are calculated for the last time point (96 hours after cell seeding).

(C-E) Effects of endogenous R-2HG generated by doxycycline-induced IDH1<sup>R132H</sup> on cell proliferation/growth in NOMO-1 (C), U937 (D), and NB4 (E) cells. Dox: doxycycline.

(F) Effects of exogenous R-2HG on cell viability in NOMO-1 and U937 cells, as determined by trypan blue staining. Cells were exposed to 300  $\mu$ M R-2HG for the indicated time points.

(G) Doxycycline-induced IDH1<sup>R132H</sup> expression was validated by Western blot with IDH1<sup>R132H</sup>-specific antibody in NOMO-1, U937, K562, and NB4 cells.  $\beta$ -actin is the endogenous control for different samples.

(H) The intracellular R-2HG accumulation was confirmed after 48 hours of exogenous R-2HG treatment at indicated concentrations, and at 2 days and 4 days post doxycycline induction.

(I) Overlap analysis of the metabolites which are downregulated in NOMO-1 cells upon exogenous R-2HG (300  $\mu$ M) or doxycycline-induced endogenous R-2HG treatment as detected by metabolomic assays. The 48 commonly downregulated metabolites were screened out and subject to further pathway enrichment analysis (see Figures S1J-S1L).

(J) Heatmap showing relative intracellular level changes of the 48 metabolites downregulated in both exogenous and endogenous R-2HG-treated NOMO-1 cells (see Figure S1I). Data are represented as normalized intracellular levels.

(K and L) Pathway enrichment analysis of the 48 metabolites downregulated in both exogenous and endogenous R-2HG-treated NOMO-1 cells identifies carbohydrate metabolism as one of the top enriched KEGG metabolic pathway classes (K), and glycolysis as one of the top enriched carbohydrate metabolic pathways (L).

Data are represented as mean  $\pm$  SD. ns, not significant ( $p \geq 0.05$ ); \*\*\*,  $p < 0.001$ ; two-tailed student t-test.

See also Table S3.

## U937

## K562

### A Glycolytic Rate (Seahorse)

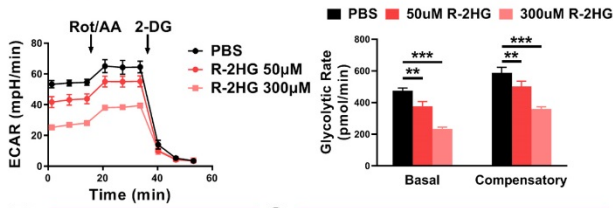

### F Glycolytic Rate (Seahorse)

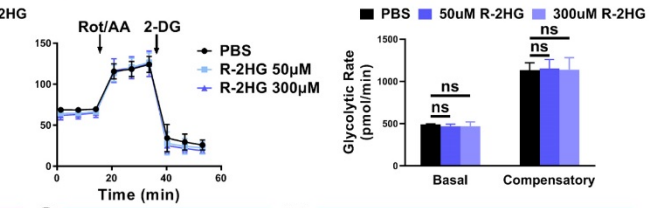

### B OXPHOS

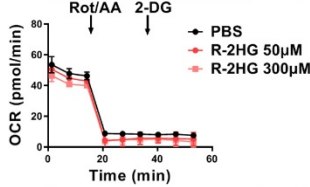

### C Glycolytic Rate (Radioactive)

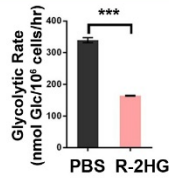

### G OXPHOS

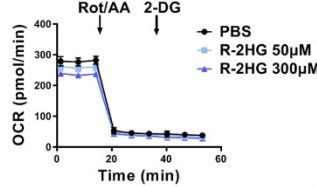

### H Glycolytic Rate (Radioactive)

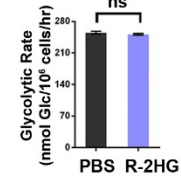

### D Lactate levels

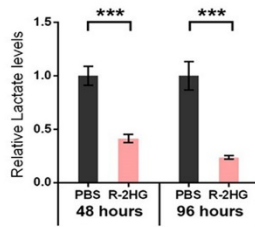

### E ATP levels

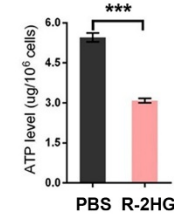

### I Lactate levels

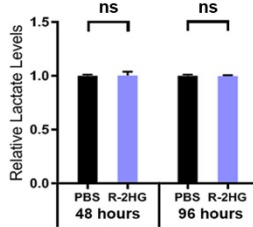

### J ATP levels

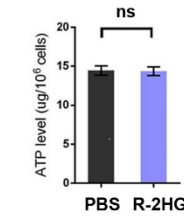

### K Glycolytic Rate (Seahorse)

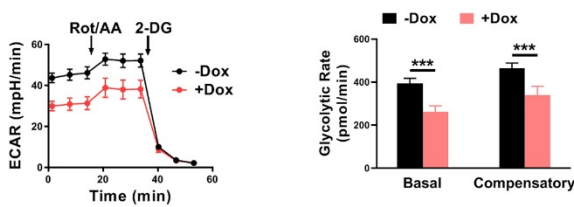

### P Glycolytic Rate (Seahorse)

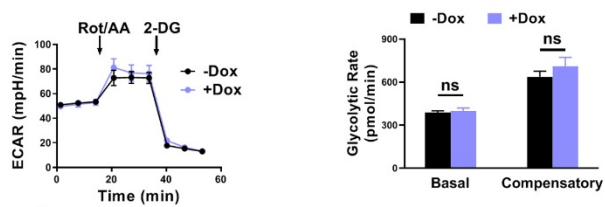

### L OXPHOS

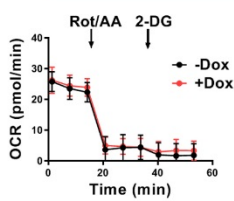

### M Glycolytic Rate (Radioactive)

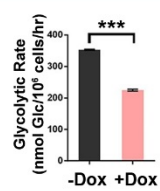

### Q Metabolic phenotype in U87 cells

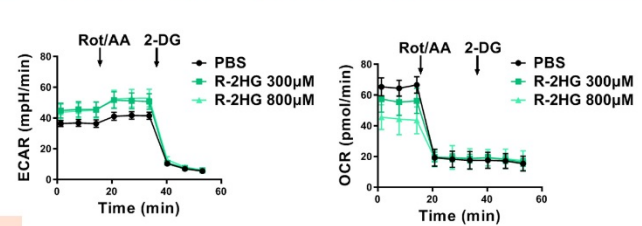

### N Lactate levels

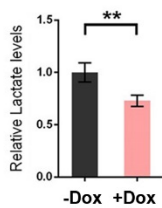

### O ATP levels

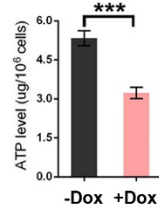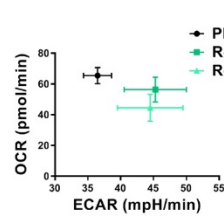

U87

**Figure S2 (related to Figure 2). Both exogenous and endogenous R-2HG target glycolysis in sensitive U937, but not resistant K562 cells, to inhibit cellular metabolism**

(A) Exogenous R-2HG treatment reduced glycolytic rates in a dose-dependent manner in U937 cells, as measured by the Seahorse Glycolytic Rate Assay. U937 cells were pre-treated with PBS or R-2HG for 24 hours prior to the assay. ECAR measured over time (left panel) and the calculated basal and compensatory glycolytic rates (right panel) are shown.

(B) Effect of exogenous R-2HG treatment on mitochondrial respiration in U937 cells.

(C) Effect of exogenous R-2HG on glycolysis as determined by radioactive glycolysis assay in U937 cells.

(D) Effects of exogenous R-2HG on lactate levels in U937 cells. The cells were exposed to 300  $\mu$ M R-2HG for 48 hours.

(E) Effects of exogenous R-2HG on ATP levels in U937 cells. The cells were exposed to 300 $\mu$ M R-2HG for 48 hours.

(F) Effects of exogenous R-2HG on glycolytic rates as determined by the Seahorse Glycolytic Rate Assay in K562 cells. The cells were treated with PBS or R-2HG at the indicated concentrations for 24 hours prior to measurement. ECAR over time (left panel) and the calculated glycolytic rates (right panel) are shown.

(G) Effects of exogenous R-2HG on OCR in K562 cells. The cells were treated with R-2HG for 24 hours.

(H) Effects of exogenous R-2HG on glycolytic rates as detected by radioactive glycolysis assay in K562 cells. The cells were treated with PBS or 300  $\mu$ M R-2HG for 48 hours prior to measurement.

(I) Effects of exogenous R-2HG on lactate levels in K562 cells. The cells were exposed to 300  $\mu$ M R-2HG for 48 hours.

(J) Effects of exogenous R-2HG on ATP levels in K562 cells. The cells were exposed to 300  $\mu$ M R-2HG for 48 hours.

(K) Effects of endogenous R-2HG produced by IDH1<sup>R132H</sup> on glycolytic rates in U937 cells, as determined by the Seahorse Glycolytic Rate Assay. The cells were treated with PBS or doxycycline for 48 hours to induce IDH1<sup>R132H</sup> expression prior to measurement. ECAR over time (left panel) and the calculated glycolytic rates (right panel) are shown.

(L-O) Effects of endogenous R-2HG on mitochondrial respiration (L), glycolytic rates (M, as detected by radioactive glycolysis assay), lactate levels (N), and ATP levels (O) in U937 cells.

(P) Effects of endogenous R-2HG generated by IDH1<sup>R132H</sup> on glycolytic rates as determined by the Seahorse Glycolytic Rate Assay in K562 cells. The cells were treated with PBS or doxycycline for 48 hours to induce IDH1<sup>R132H</sup> expression prior to measurement. ECAR over time (left panel) and the calculated glycolytic rates (right panel) are shown.

(Q) Effects of exogenous R-2HG treatment on glycolytic rates (upper left panel) and mitochondrial respiration (upper right panel) in the GBM cell line U87. ECAR and OCR data are plotted on the energy map (lower panel) to reveal the overall basal metabolic profiles of cells with or without R-

2HG treatment. U87 cells were pre-treated with PBS or R-2HG (at indicated concentrations) for 1 hour prior to the assay.

Data are represented as mean  $\pm$  SD. ns, not significant ( $p \geq 0.05$ ); \*\*,  $p < 0.01$ ; \*\*\*,  $p < 0.001$ ; two-tailed student t-test.

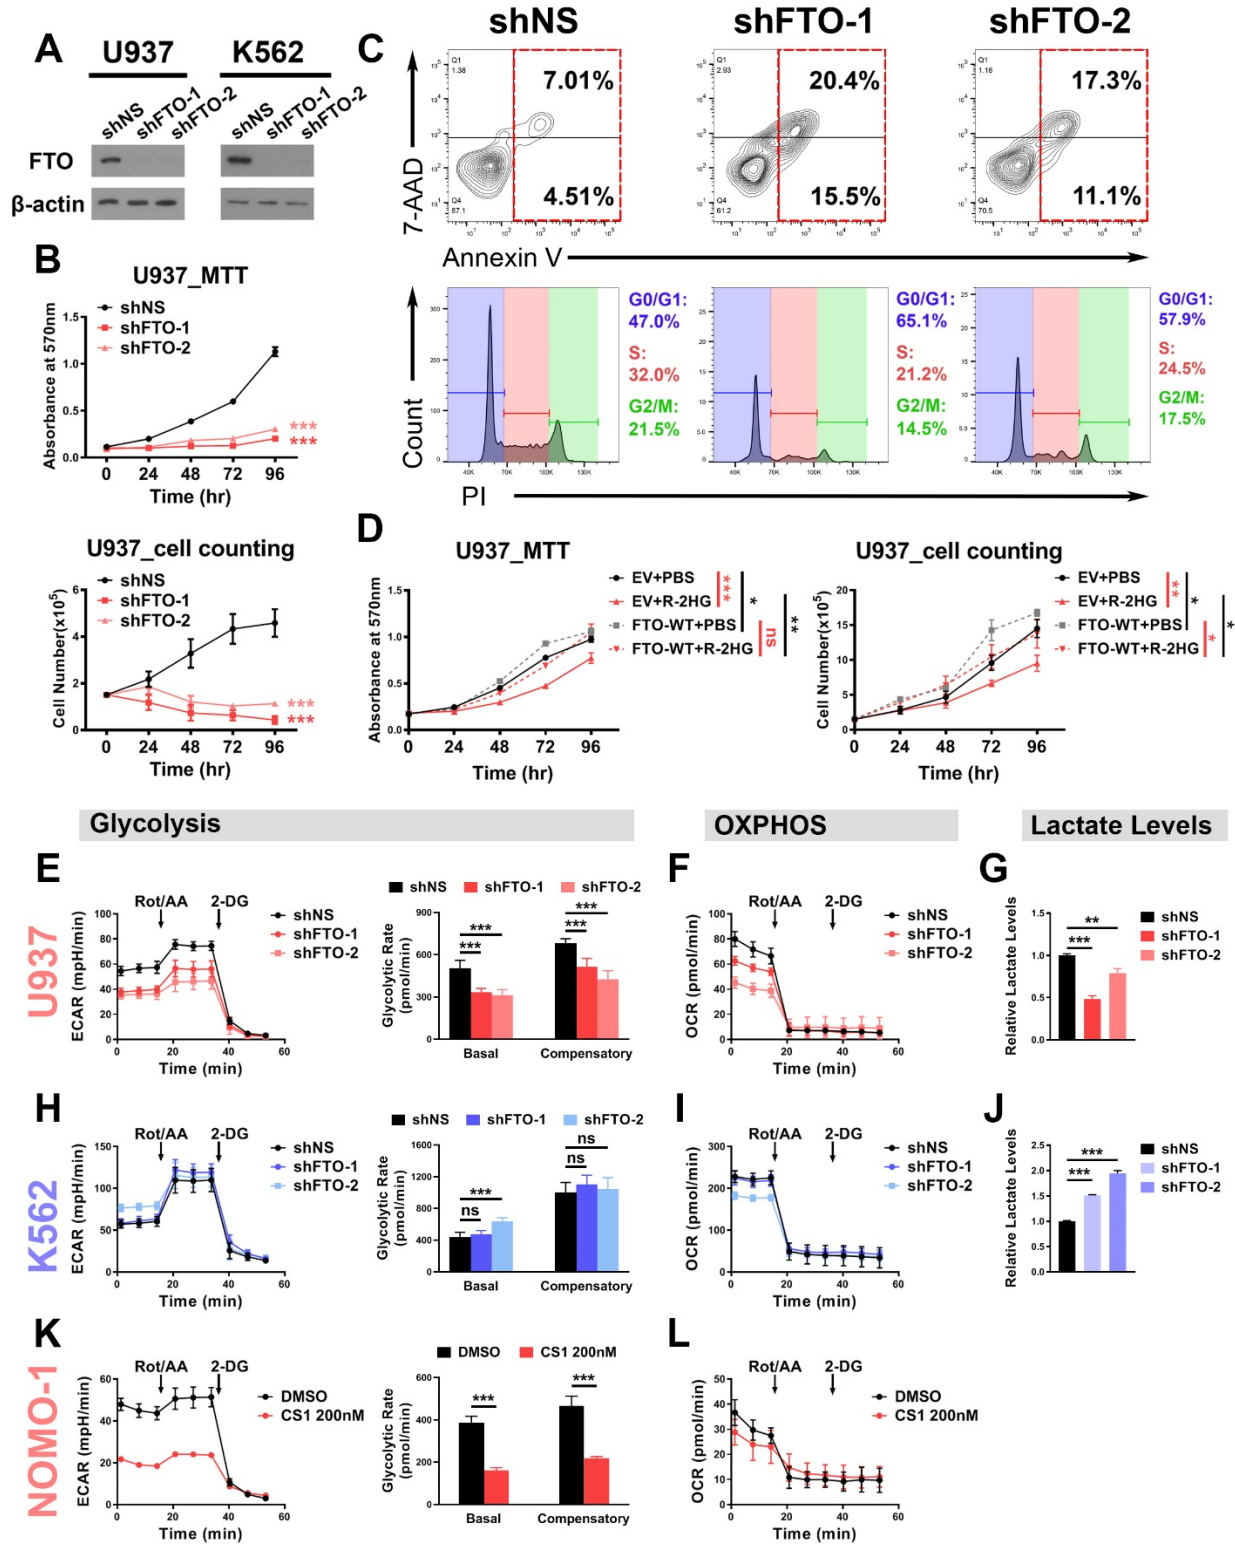

**Figure S3 (related to Figure 3). FTO is required to maintain cell proliferation/survival and aerobic glycolysis in sensitive leukemia cells**

(A) *FTO* knockdown efficiency is confirmed by Western blots in U937 and K562 cells.

(B) Effects of *FTO* knockdown on cell proliferation/growth in U937 cells, as determined by MTT (upper panel) and cell counting assays (lower panel). The p values are calculated for the last time point (96 hours after cell seeding).

(C) Effects of *FTO* knockdown on apoptosis (upper row) and cell-cycle (lower row) in U937 cells, as determined by flow cytometry.

(D) Overexpression of wild-type FTO rescued the growth inhibition induced by R-2HG (100  $\mu$ M) in U937 cells. Cell proliferation/growth was evaluated by both MTT assay (left panel) and cell counting (right panel).

(E-G) Effects of *FTO* knockdown on basal and compensatory glycolysis (E), mitochondrial respiration (F), and lactate levels (G) in U937 cells.

(H-J) Effects of *FTO* knockdown on basal and compensatory glycolysis (H), mitochondrial respiration (I), and lactate levels (J) in K562 cells.

(K and L) Effects of the FTO inhibitor, CS1, on basal and compensatory glycolysis (K) and mitochondrial respiration (L).

Data are represented as mean  $\pm$  SD. ns, not significant ( $p \geq 0.05$ ); \*,  $p < 0.05$ ; \*\*,  $p < 0.01$ ; \*\*\*,  $p < 0.001$ ; two-tailed student t-test.



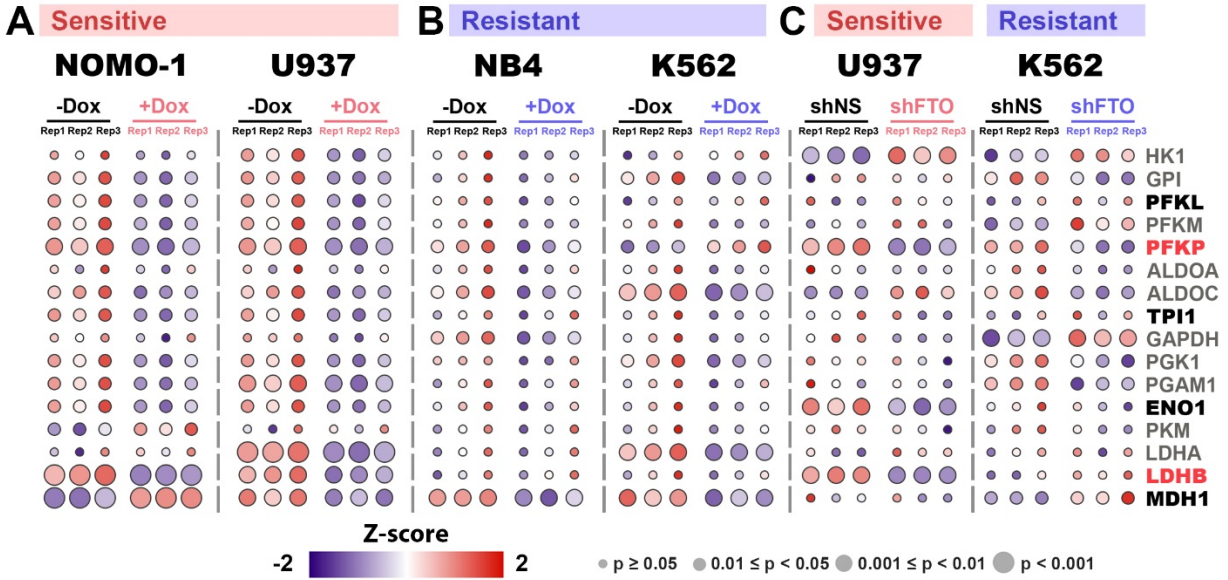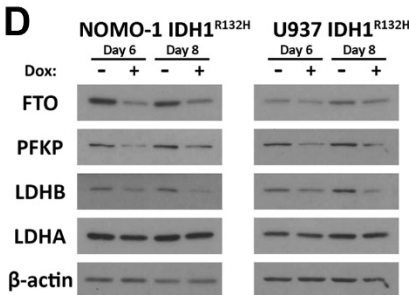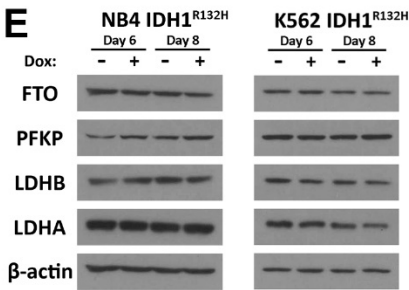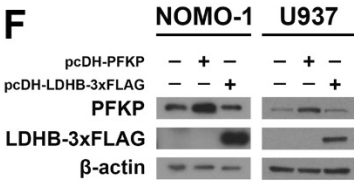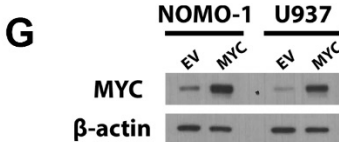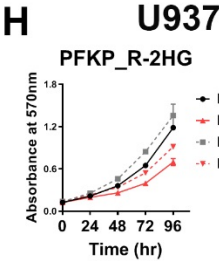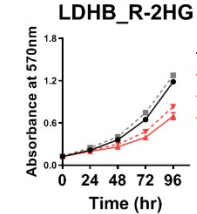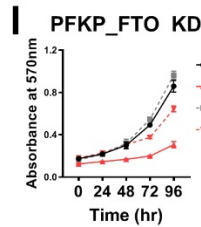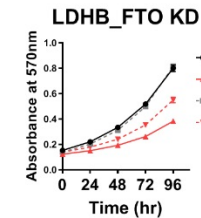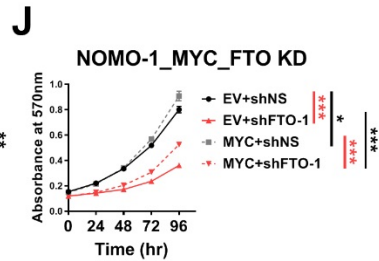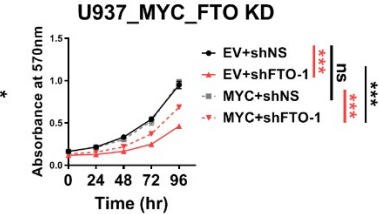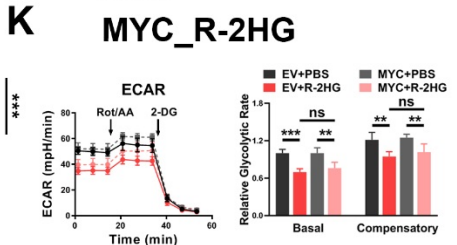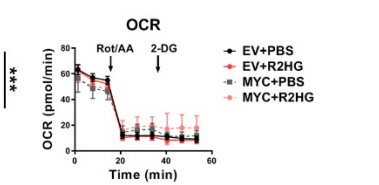

**Figure S4 (related to Figure 4). PFKP and LDHB are critical downstream metabolic targets of the R-2HG/FTO axis in sensitive leukemia cells**

(A and B) Relative expression of the screened out genes (see Figure 4A) along with other glycolytic enzymes in sensitive cells (A) and resistant cells (B) with or without doxycycline-induced endogenous R-2HG production, as determined by RT-qPCR. The color represents normalized expression level of a given gene; the diameter indicates significance of the difference between PBS- and doxycycline-treated samples. The screened out genes are marked in bold, with the identified two targets PFKP and LDHB highlighted in red. Among all tested genes, HK1, PFKL, PFKM, PFKP, PKM, LDHA, and LDHB are glycolysis-related, while MDH1 is gluconeogenesis-related; all other genes are related to both glycolysis and gluconeogenesis.

(C) Relative expression of the screened out genes (see Figure 4A) along with other glycolytic enzymes in sensitive U937 cells and resistant K562 cells with or without *FTO* knockdown, as determined by RT-qPCR. The screened out genes are marked in bold, with the identified two targets PFKP and LDHB highlighted in red. Among all tested genes, HK1, PFKL, PFKM, PFKP, PKM, LDHA, and LDHB are glycolysis-related, while MDH1 is gluconeogenesis-related; all other genes are related to both glycolysis and gluconeogenesis.

(D and E) Western blot validation of the protein levels of FTO, PFKP, LDHB, and LDHA in sensitive cells (D) and resistant cells (E) in the presence or absence of endogenous R-2HG. Samples were collected at two time points: 6 days and 8 days after addition of PBS or doxycycline to the cell culture medium.

(F) Confirmation of overexpression efficiency of *PFKP* and *LDHB* by Western blots in NOMO-1 and U937 cells.

(G) Confirmation of overexpression efficiency of *MYC* by Western blots in NOMO-1 and U937 cells. EV: empty vector.

(H) Cell proliferation/growth was evaluated by MTT assays in PBS- and 100  $\mu$ M R-2HG-treated U937 cells, with or without forced expression of *PFKP* (upper panel) or *LDHB* (lower panel). The same control groups (EV+PBS and EV+R-2HG) were used for the analysis.

(I) Cell proliferation/growth was evaluated in control and *FTO*-knockdown U937 cells with or without forced expression of *PFKP* (upper panel) or *LDHB* (lower panel).

(J) Cell proliferation/growth was evaluated in control and *FTO*-knockdown NOMO-1 (upper panel) and U937 (lower panel) cells, with or without forced expression of *MYC*.

(K) Effects of *MYC* overexpression on basal/compensatory glycolytic rates (upper panel) and mitochondrial respiration (lower panel) in 50  $\mu$ M R-2HG-treated U937 cells.

Data are represented as mean  $\pm$  SD. ns, not significant ( $p \geq 0.05$ ); \*,  $p < 0.05$ ; \*\*,  $p < 0.01$ ; \*\*\*,  $p < 0.001$ ; two-tailed student t-test.

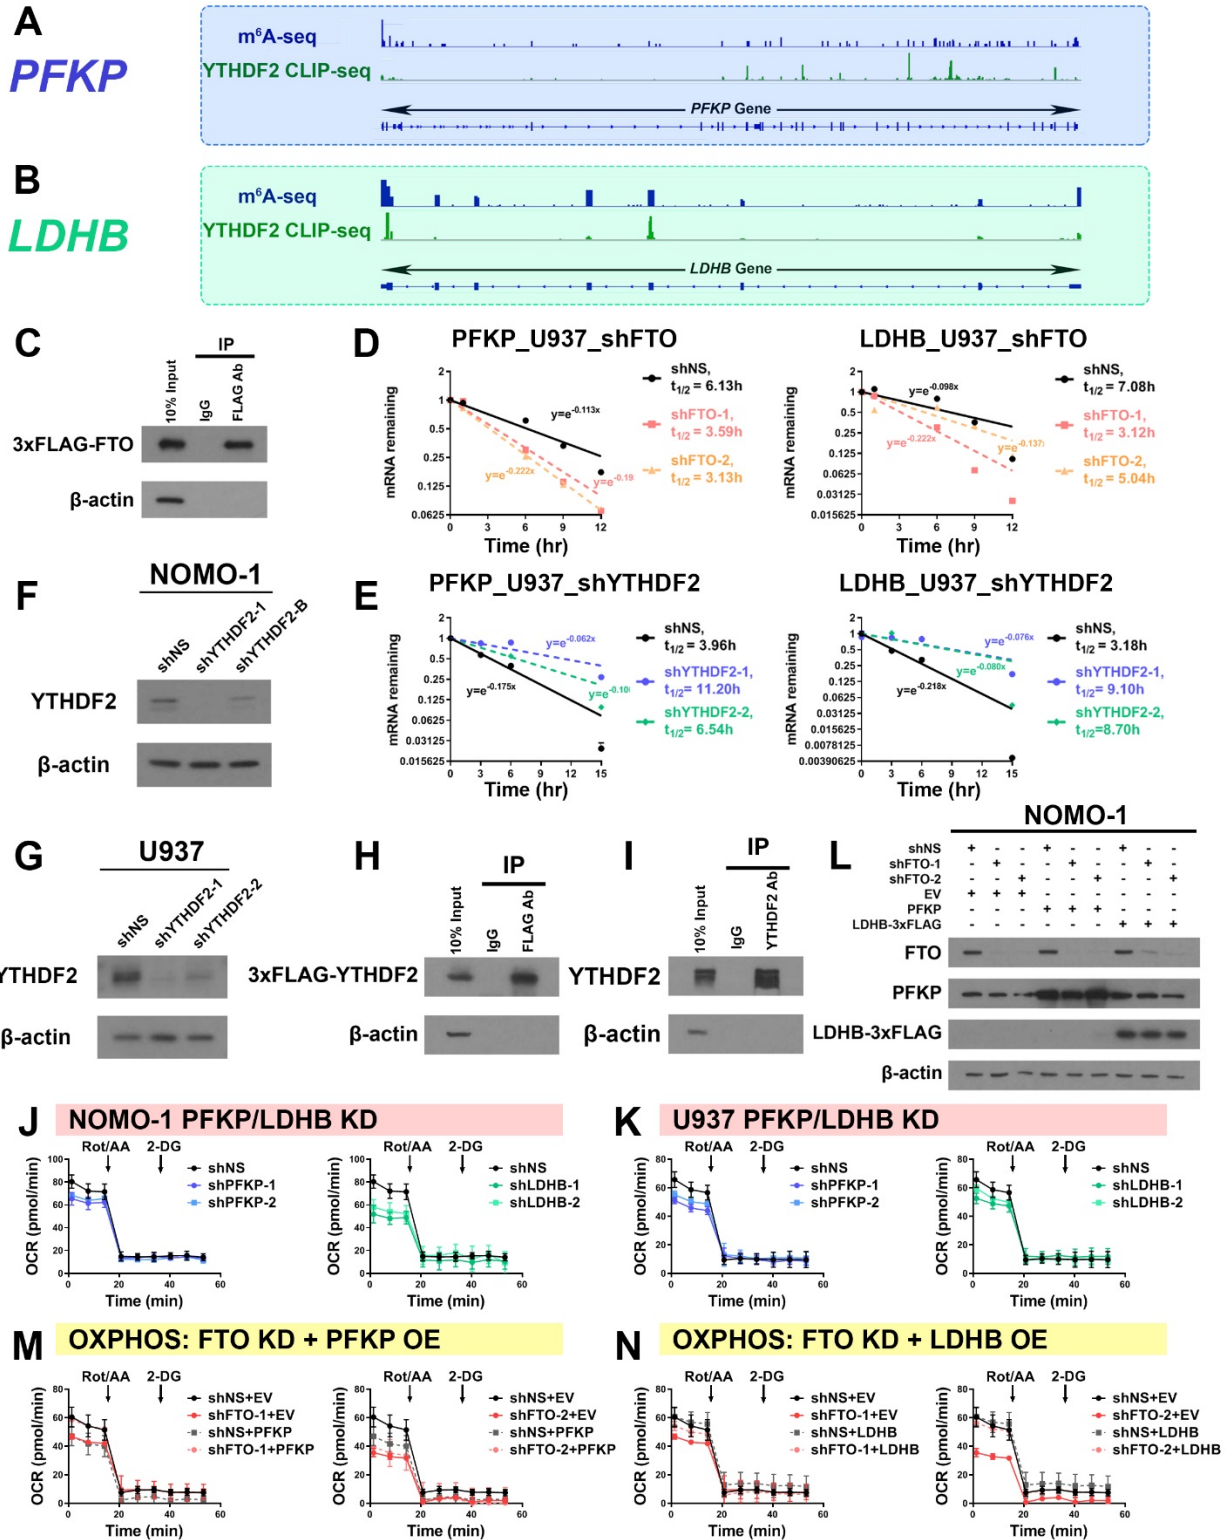

**Figure S5 (related to Figure 5). The FTO/m<sup>6</sup>A/YTHDF2 axis regulates *PFKP* and *LDHB* expression**

(A and B) Genome sequencing tracks show the m<sup>6</sup>A peaks (upper panel) and YTHDF2 binding to the m<sup>6</sup>A-modified regions (lower panel) in *PFKP* (A) and *LDHB* (B) transcripts.

(C) Confirmation of immunoprecipitation (IP) efficiency and specificity of 3×FLAG-FTO with FLAG antibody.

(D) RNA stability of *PFKP* (left panel) and *LDHB* (right panel) transcripts in U937 cells upon *FTO* knockdown.

(E) RNA stability of *PFKP* (left panel) and *LDHB* (right panel) transcripts in U937 cells upon *YTHDF2* knockdown.

(F and G) Validation of *YTHDF2* knockdown efficiency in NOMO-1 (F) and U937 (G) cells via Western blots.

(H) Confirmation of immunoprecipitation (IP) efficiency and specificity of 3×FLAG-YTHDF2 with FLAG antibody in HEK-293T cells.

(I) Confirmation of immunoprecipitation (IP) efficiency and specificity of endogenous YTHDF2 with YTHDF2 antibody in NOMO-1 cells.

(J) Mitochondrial respiration in NOMO-1 cells upon *PFKP* (left panel) or *LDHB* (right panel) knockdown. The same control shNS group was used for the analysis.

(K) Mitochondrial respiration in U937 cells upon *PFKP* (left panel) or *LDHB* (right panel) knockdown. The same control shNS group was used for the analysis.

(L) Knockdown of *FTO* and forced expression of *PFKP* and *LDHB*-3xFLAG in NOMO-1 cells was confirmed by Western blots.

(M) Effects of *FTO* knockdown with or without *PFKP* overexpression on mitochondrial respiration in NOMO-1 cells. The same control groups (shNS+EV and shNS+*PFKP*) were used for the analysis.

(N) Effects of *FTO* knockdown with or without *LDHB* overexpression on mitochondrial respiration in NOMO-1 cells. The same control groups (shNS+EV and shNS+*LDHB*) were used for the analysis.

Data are represented as mean ± SD.

**Cord blood CD34<sup>+</sup> HSPCs**

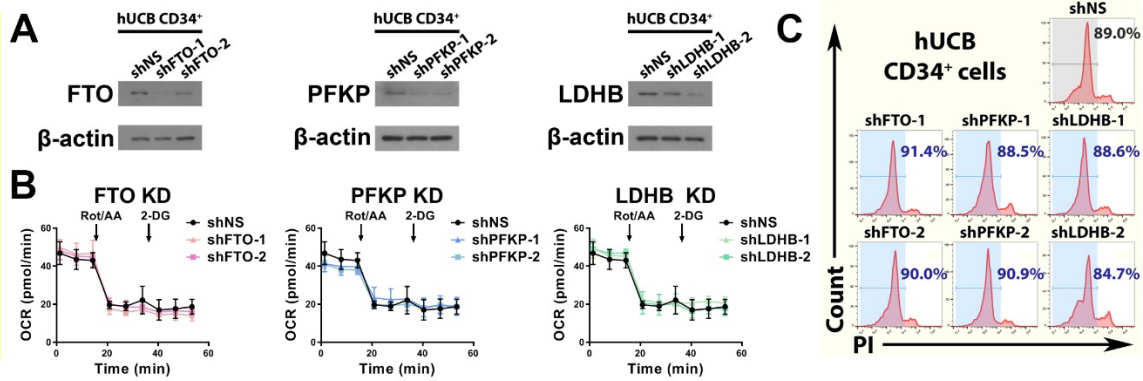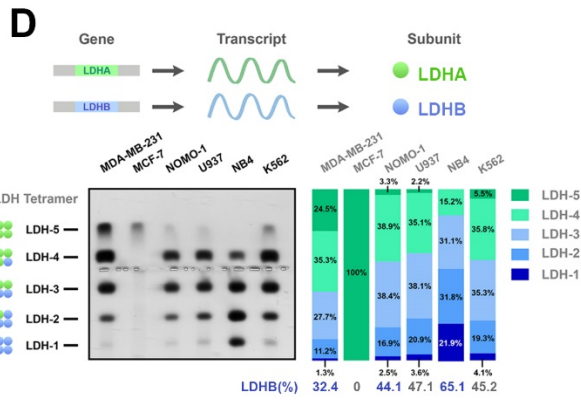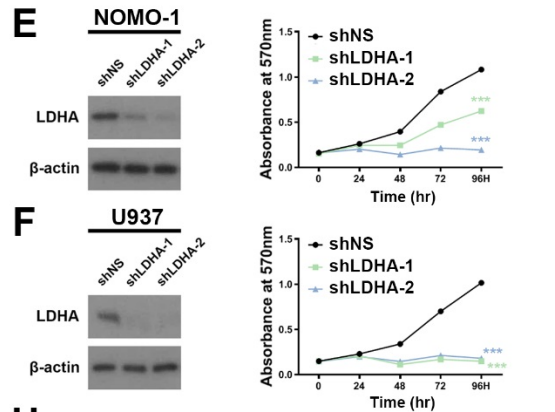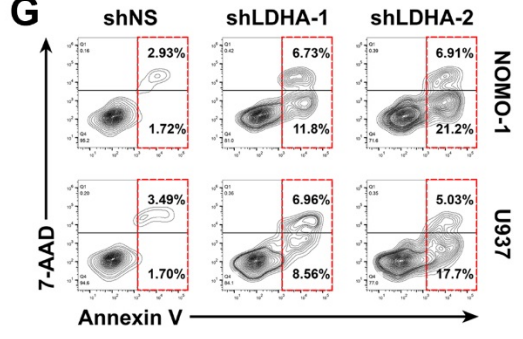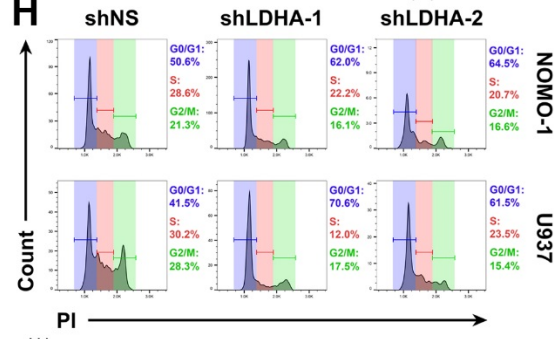

**NOMO-1**

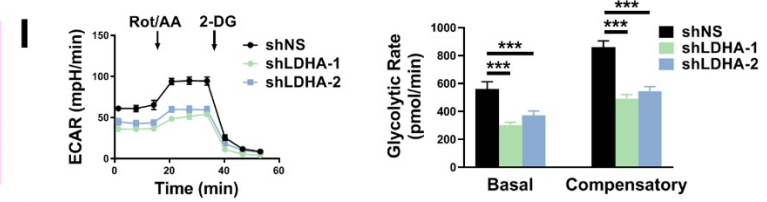

**U937**

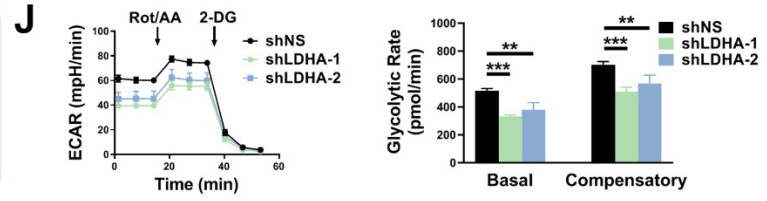

**Figure S6 (related to Figure 6). *FTO/PFKP/LDHB* knockdown has minimal effects in normal CD34<sup>+</sup> HSPCs and *LDHA* knockdown impairs cell metabolism and survival in leukemia cells**

(A) Validation of knockdown efficiency of *FTO* (left panel), *PFKP* (middle panel), and *LDHB* (right panel) in human cord blood CD34<sup>+</sup> HSPCs via Western blots.

(B) Effects of knockdown of *FTO* (left panel), *PFKP* (middle panel), and *LDHB* (right panel) on mitochondrial respiration in human cord blood CD34<sup>+</sup> HSPCs. The same control shNS group was used for the analysis.

(C) Effects of knockdown of *FTO*, *PFKP*, and *LDHB* on cell viability in human cord blood CD34<sup>+</sup> HSPCs, as determined by PI staining. The percentage of viable cells in each group is shown.

(D) Distribution of the five LDH isoenzymes in the leukemia cell lines used in this study (NOMO-1, U937, NB4, and K562), as determined by zymography. Two breast cancer cell lines, MDA-MB-231 and MCF-7 were included as technical controls for the zymography.

(E and F) Effects of *LDHA* knockdown on cell proliferation/growth in NOMO-1 (E) and U937 (F) cells.

(G and H) Effects of *LDHA* knockdown on apoptosis (G) and cell cycle (H) in NOMO-1 and U937 cells.

(I and J) Effects of *LDHA* knockdown on basal and compensatory glycolytic rates in NOMO-1 (I) and U937 (J) cells.

(K and L) Effects of *LDHA* knockdown on mitochondrial respiration in NOMO-1 (K) and U937 (L) cells.

Data are represented as mean  $\pm$  SD. \*\*,  $p < 0.01$ ; \*\*\*,  $p < 0.001$ ; two-tailed student t-test.

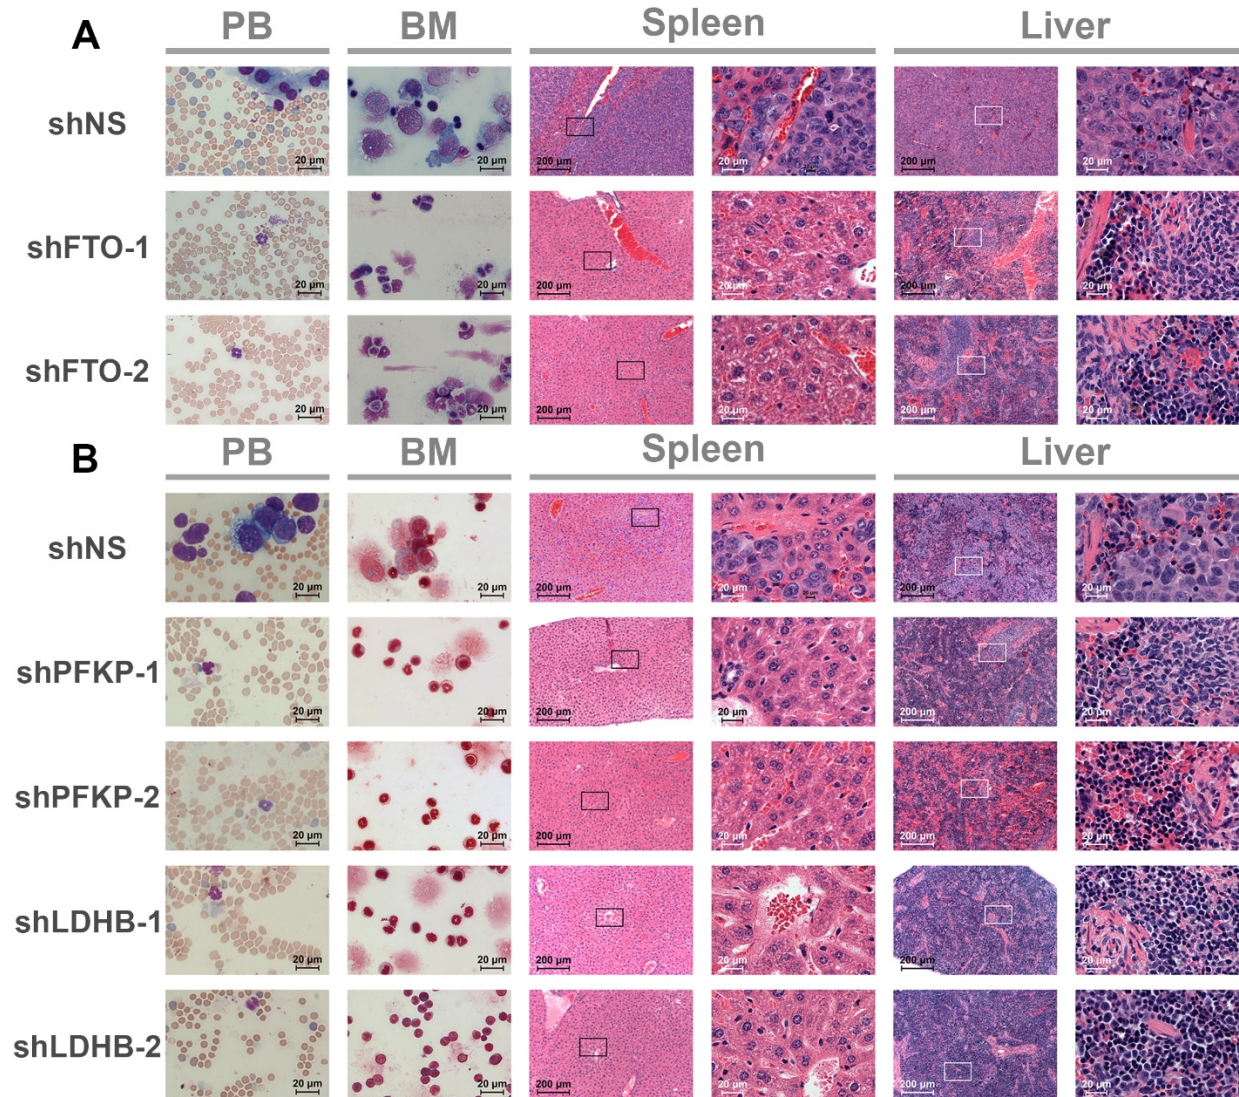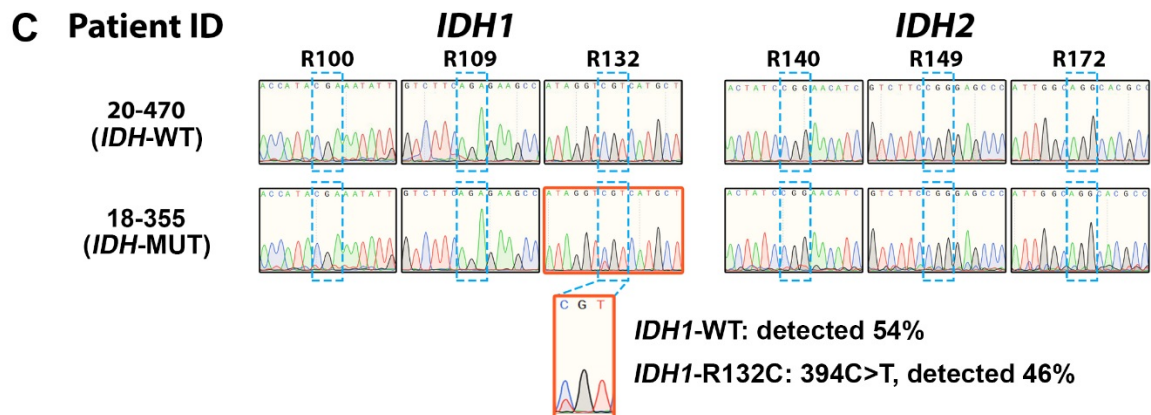

**Figure S7 (related to Figure 7). Histopathology analysis of representative NRGS mice with *FTO*, *PFKP*, or *LDHB* knockdown and confirmation of *IDH* mutation status in primary patient-derived cells**

(A) Wright-Giemsa stained peripheral blood (PB) and bone marrow (BM) smears, and hematoxylin and eosin (H&E) stained spleen and liver specimens from NRGS mice transplanted with control or *FTO*-knockdown MONO-MAC-6 cells. Specimens were collected at the same time point. The fourth and sixth columns are corresponding magnifications of the area inside the frames in the third and fifth columns. Many leukemia cells with large irregular nuclei can be observed in control but not in *FTO*-knockdown groups. The bar represents 20  $\mu\text{m}$  in the first, second, fourth, and sixth columns; while the bar represents 200  $\mu\text{m}$  in the third and fifth columns.

(B) Wright-Giemsa stained PB and BM smears, and H&E stained spleen and liver specimens from NRGS mice transplanted with control, *PFKP*- or *LDHB*-knockdown MONO-MAC-6 cells. Specimens were collected at the same time point. The fourth and sixth columns are corresponding magnifications of the area inside the frames in the third and fifth columns. The bar represents 20  $\mu\text{m}$  in the first, second, fourth, and sixth columns; while the bar represents 200  $\mu\text{m}$  in the third and fifth columns.

(C) Sanger sequencing confirmation of the *IDH* mutation status in AML patient-derived cells used in this study. Patient 20-470 is wild-type for both *IDH1* and *IDH2*, whereas 46% cells from patient 18-355 are reported to harbor *IDH1*<sup>R132C</sup> mutation. The chromatograms for six mutation hotspots are displayed.



**Table S1 (related to Figure 1). Metabolite levels in NOMO-1 cells treated with PBS or R-2HG**

| Name                | KEGG.ID | PBS#1   | PBS#2   | PBS#3  | R-2HG#1 | R-2HG#2 | R-2HG#3 | p value |
|---------------------|---------|---------|---------|--------|---------|---------|---------|---------|
| 13BPG               | C00236  | 5.29    | 5.24    | 4.64   | 0.00    | 0.00    | 0.00    | 0.00    |
| 2-HG                | C02630  | 93.95   | 86.36   | 80.56  | 7768.93 | 6736.89 | 6655.30 | 0.00    |
| 2-Oxoadipate        | C00322  | 0.75    | 0.10    | 0.29   | 0.63    | 0.47    | 0.16    | 0.87    |
| 2-Oxosuccinamate    | C02362  | 0.00    | 0.00    | 0.00   | 0.91    | 0.18    | 0.05    | 0.23    |
| 3PG                 | C00197  | 19.98   | 12.54   | 14.88  | 2.34    | 3.46    | 5.59    | 0.01    |
| 5-Oxoproline        | C01879  | 942.82  | 917.63  | 806.09 | 629.34  | 430.32  | 565.94  | 0.01    |
| 5M-adenosine        | C00170  | 12.80   | 16.99   | 8.27   | 22.58   | 9.36    | 27.18   | 0.30    |
| A                   | C00212  | 0.00    | 0.00    | 0.00   | 0.00    | 0.03    | 0.05    | 0.15    |
| a-KG                | C00026  | 550.32  | 540.10  | 470.82 | 47.45   | 42.67   | 34.58   | 0.00    |
| Ac-carnitine        | C02571  | 298.47  | 298.46  | 259.54 | 38.28   | 29.32   | 25.45   | 0.00    |
| Ac-choline          | C01996  | 30.94   | 27.82   | 25.79  | 12.56   | 8.78    | 9.46    | 0.00    |
| Acetyl-CoA          | C00024  | 0.43    | 0.43    | 0.21   | 0.94    | 0.50    | 0.39    | 0.24    |
| Aconitate           | C00417  | 16.22   | 15.54   | 12.93  | 3.69    | 0.70    | 0.59    | 0.00    |
| Adenine             | C00147  | 0.00    | 0.00    | 0.00   | 0.00    | 0.10    | 0.05    | 0.15    |
| ADP                 | C00008  | 33.78   | 40.06   | 43.37  | 14.60   | 14.65   | 17.01   | 0.00    |
| ADP/ATP             | NA      | 0.17    | 0.22    | 0.30   | 0.24    | 0.34    | 0.36    | 0.19    |
| Ala                 | C00041  | 51.72   | 44.94   | 43.30  | 11.92   | 4.18    | 4.17    | 0.00    |
| AMP                 | C00020  | 10.88   | 13.96   | 21.59  | 4.53    | 3.28    | 6.69    | 0.03    |
| AMP/ATP             | NA      | 0.05    | 0.08    | 0.15   | 0.07    | 0.08    | 0.14    | 0.91    |
| Arg                 | C00062  | 1091.45 | 1149.60 | 972.52 | 952.66  | 1059.78 | 1319.84 | 0.76    |
| Arg-Succ            | C03406  | 1.57    | 1.25    | 1.05   | 0.54    | 0.31    | 0.40    | 0.01    |
| Asn                 | C00152  | 436.20  | 408.60  | 368.06 | 285.94  | 224.88  | 263.42  | 0.01    |
| Asp                 | C00049  | 184.68  | 169.98  | 159.61 | 222.48  | 187.17  | 214.08  | 0.05    |
| ATP                 | C00002  | 200.51  | 182.68  | 145.49 | 61.66   | 43.40   | 46.78   | 0.00    |
| C                   | D07769  | 7.99    | 6.26    | 3.24   | 1.21    | 0.37    | 0.57    | 0.02    |
| Carbamoyl-Asp       | C00438  | 2.59    | 1.68    | 1.40   | 0.00    | 0.00    | 0.00    | 0.01    |
| Carnitine           | C00318  | 608.79  | 556.05  | 521.76 | 273.98  | 219.45  | 230.46  | 0.00    |
| CDP                 | C00112  | 4.13    | 4.47    | 5.31   | 0.60    | 0.56    | 0.93    | 0.00    |
| CDP-choline         | C00307  | 2.29    | 2.27    | 2.35   | 6.78    | 5.62    | 5.36    | 0.00    |
| Choline             | C00114  | 62.08   | 70.49   | 67.76  | 486.55  | 260.32  | 334.45  | 0.01    |
| Cit                 | C00158  | 987.39  | 909.21  | 866.46 | 215.18  | 106.32  | 79.37   | 0.00    |
| Citrulline          | C00327  | 20.13   | 6.13    | 5.57   | 49.41   | 3.85    | 2.33    | 0.65    |
| CMP                 | C00055  | 0.52    | 0.70    | 1.07   | 0.08    | 0.03    | 0.16    | 0.02    |
| CoA                 | C00010  | 2.37    | 2.05    | 1.81   | 0.91    | 0.75    | 0.81    | 0.00    |
| Creatine            | C00300  | 1116.61 | 1063.38 | 957.88 | 144.84  | 119.62  | 109.33  | 0.00    |
| Creatine/P-Creatine | NA      | 60.64   | 62.14   | 68.68  | 449.51  | 131.87  | 123.02  | 0.19    |
| Creatinine          | C00791  | 5.71    | 10.99   | 5.05   | 34.44   | 4.00    | 4.89    | 0.52    |
| CTP                 | C00063  | 14.28   | 13.42   | 9.30   | 2.75    | 1.65    | 1.34    | 0.00    |
| Cys                 | C00097  | 0.00    | 0.00    | 0.00   | 1.57    | 2.12    | 2.50    | 0.00    |
| Cys Sulfinic Acid   | C00606  | 0.00    | 0.00    | 0.00   | 0.69    | 0.05    | 0.11    | 0.24    |
| Cytosine            | C00380  | 0.84    | 0.56    | 0.06   | 0.19    | 0.03    | 0.03    | 0.16    |
| dATP                | C00131  | 1.75    | 1.85    | 1.13   | 0.00    | 0.00    | 0.00    | 0.00    |
| dCDP                | C00705  | 0.00    | 0.04    | 0.07   | 0.00    | 0.00    | 0.00    | 0.15    |

|                |        |         |         |         |         |         |         |      |
|----------------|--------|---------|---------|---------|---------|---------|---------|------|
| dCTP           | C00458 | 0.42    | 0.31    | 0.07    | 0.04    | 0.00    | 0.04    | 0.08 |
| Dihydroorotate | C00337 | 0.00    | 0.00    | 0.00    | 0.05    | 0.04    | 0.00    | 0.12 |
| DMG            | C01026 | 0.14    | 0.05    | 0.11    | 10.33   | 0.33    | 0.62    | 0.33 |
| dTTP           | C00459 | 0.73    | 0.66    | 0.54    | 0.00    | 0.00    | 0.00    | 0.00 |
| F16BP          | C00354 | 1.08    | 1.18    | 1.07    | 3.21    | 1.76    | 1.18    | 0.20 |
| Folate         | C00504 | 0.90    | 1.05    | 0.52    | 0.81    | 0.98    | 0.85    | 0.76 |
| Fru            | C00095 | 40.40   | 24.30   | 33.79   | 26.04   | 16.89   | 22.07   | 0.11 |
| Fum            | C00122 | 73.23   | 65.68   | 59.44   | 9.90    | 6.96    | 6.43    | 0.00 |
| G              | C00387 | 0.49    | 0.33    | 0.20    | 0.00    | 0.00    | 0.00    | 0.02 |
| g-GluCys       | C00669 | 1.00    | 0.80    | 0.93    | 0.31    | 0.13    | 0.33    | 0.00 |
| G6P-F6P        | C00085 | 31.52   | 26.16   | 23.37   | 50.41   | 28.95   | 17.46   | 0.63 |
| GABA           | C00334 | 47.79   | 41.41   | 39.82   | 4.43    | 2.50    | 3.73    | 0.00 |
| GDP            | C00035 | 2.23    | 3.50    | 3.75    | 1.18    | 1.26    | 1.23    | 0.01 |
| Glc            | C00031 | 102.27  | 104.77  | 90.96   | 140.80  | 118.47  | 136.84  | 0.02 |
| GlcA           | C00257 | 636.79  | 621.84  | 477.98  | 229.51  | 69.56   | 72.35   | 0.00 |
| GlcN           | C00329 | 2.95    | 3.36    | 4.09    | 9.92    | 5.93    | 2.86    | 0.25 |
| GlcN-6P        | C00352 | 0.05    | 0.00    | 0.00    | 0.00    | 0.00    | 0.00    | 0.37 |
| GlcNAc         | C00140 | 111.06  | 82.04   | 99.76   | 7.43    | 8.57    | 10.33   | 0.00 |
| GlcNAc-6P      | C00357 | 0.66    | 0.63    | 0.60    | 0.85    | 0.57    | 0.35    | 0.79 |
| Gln            | C00064 | 2018.58 | 2024.36 | 1848.30 | 1930.36 | 1587.59 | 1780.93 | 0.16 |
| Glu            | C00025 | 2575.32 | 2056.11 | 2035.48 | 257.23  | 226.41  | 240.58  | 0.00 |
| GlucA          | C00191 | 43.71   | 36.44   | 38.65   | 14.64   | 12.23   | 10.45   | 0.00 |
| Gly            | C00037 | 21.35   | 16.16   | 14.60   | 93.89   | 13.93   | 13.92   | 0.43 |
| Glycerol       | C00116 | 140.11  | 135.56  | 136.66  | 162.63  | 144.75  | 137.22  | 0.23 |
| Glycerol-3-P   | C00093 | 8.16    | 3.51    | 3.34    | 20.40   | 13.75   | 13.14   | 0.02 |
| GMP            | C00144 | 0.37    | 0.46    | 0.72    | 0.03    | 0.00    | 0.19    | 0.02 |
| GSH            | C00051 | 1695.27 | 1393.29 | 1290.39 | 417.42  | 352.52  | 304.85  | 0.00 |
| GSH/GSSG       | NA     | 11.39   | 9.55    | 10.30   | 10.37   | 11.72   | 8.25    | 0.81 |
| GSSG           | C00127 | 148.82  | 145.93  | 125.30  | 40.27   | 30.08   | 36.94   | 0.00 |
| His            | C00135 | 239.86  | 252.86  | 205.19  | 250.87  | 193.74  | 268.14  | 0.86 |
| HS2O3          | C00320 | 1.65    | 1.70    | 1.49    | 12.26   | 2.30    | 2.42    | 0.29 |
| Hypoxanthine   | C00262 | 1.03    | 0.19    | 0.42    | 0.22    | 0.00    | 0.14    | 0.17 |
| IMP            | C00130 | 0.09    | 0.16    | 0.35    | 0.96    | 0.16    | 0.16    | 0.46 |
| Inosine        | C00294 | 3.15    | 1.03    | 2.21    | 0.29    | 0.09    | 0.25    | 0.04 |
| Inositol       | C00137 | 401.92  | 374.27  | 370.75  | 650.51  | 540.67  | 508.85  | 0.01 |
| Isobutyryl-CoA | C00630 | 0.00    | 0.00    | 0.00    | 0.00    | 0.00    | 0.00    | 0.18 |
| Lac            | C00186 | 369.72  | 355.40  | 303.52  | 42.17   | 40.24   | 44.40   | 0.00 |
| Leu/Ile        | C00123 | 2007.25 | 1898.61 | 1575.79 | 2386.03 | 1921.95 | 2256.90 | 0.13 |
| Lys            | C00047 | 33.85   | 33.84   | 28.97   | 41.43   | 38.75   | 47.62   | 0.03 |
| Mal            | C00149 | 1192.06 | 1059.18 | 927.84  | 115.85  | 87.24   | 96.75   | 0.00 |
| Met            | C00073 | 336.73  | 356.28  | 315.18  | 434.80  | 437.55  | 530.33  | 0.02 |
| NAD+           | C00003 | 4.86    | 3.85    | 2.87    | 17.05   | 12.94   | 12.49   | 0.00 |
| NADH           | C00004 | 0.06    | 0.07    | 0.00    | 0.00    | 0.17    | 0.51    | 0.28 |
| Nicotinamide   | C00153 | 133.61  | 156.33  | 216.68  | 24.08   | 33.64   | 59.92   | 0.01 |
| Ornithine      | C00077 | 2.00    | 2.05    | 1.85    | 2.79    | 1.41    | 1.93    | 0.86 |
| Orotidine      | X00006 | 82.83   | 72.86   | 64.81   | 7.52    | 5.85    | 5.62    | 0.00 |
| P-Choline      | C00588 | 7031.18 | 6827.85 | 5504.64 | 362.47  | 312.32  | 336.06  | 0.00 |
| P-Creatine     | C02305 | 18.41   | 17.11   | 13.95   | 0.32    | 0.91    | 0.89    | 0.00 |

|               |        |           |           |           |           |           |           |      |
|---------------|--------|-----------|-----------|-----------|-----------|-----------|-----------|------|
| P-EtA         | C00346 | 63.28     | 53.67     | 47.65     | 30.25     | 24.29     | 27.48     | 0.00 |
| P-Ser         | C01005 | 0.39      | 0.43      | 0.20      | 0.03      | 0.00      | 0.04      | 0.01 |
| Palmitate     | C00249 | 3006.99   | 2969.85   | 3488.52   | 8967.64   | 2758.37   | 2832.57   | 0.46 |
| Pantothenate  | C00864 | 176.22    | 150.80    | 128.61    | 37.10     | 26.44     | 27.43     | 0.00 |
| PC(34:2)      | X00001 | 0.10      | 0.00      | 0.07      | 0.00      | 0.08      | 0.05      | 0.72 |
| PEP           | C00074 | 5.99      | 3.34      | 3.74      | 0.44      | 0.62      | 1.49      | 0.02 |
| Phe           | C00079 | 754.84    | 780.83    | 642.01    | 731.41    | 664.87    | 828.99    | 0.82 |
| Pipecolate    | C00408 | 3.34      | 3.31      | 2.88      | 3.65      | 3.68      | 4.42      | 0.06 |
| PO4           | C00009 | 43.79     | 44.30     | 32.86     | 29.40     | 23.88     | 36.54     | 0.12 |
| PPi           | C00013 | 0.19      | 0.25      | 0.05      | 2.44      | 0.06      | 0.09      | 0.43 |
| Pro           | C00148 | 2011.15   | 1991.75   | 1701.31   | 661.12    | 408.37    | 493.02    | 0.00 |
| Pro-OH        | C01157 | 364.07    | 349.40    | 318.16    | 229.19    | 182.64    | 214.97    | 0.00 |
| Propanoyl-CoA | C00100 | 0.00      | 0.00      | 0.00      | 0.01      | 0.00      | 0.00      | 0.14 |
| PRPP          | C00119 | 3.99      | 3.04      | 1.41      | 1.41      | 0.71      | 1.10      | 0.09 |
| Pyr           | C00022 | 0.95      | 0.46      | 0.62      | 0.24      | 0.30      | 0.79      | 0.37 |
| R5P           | C00117 | 7.12      | 5.93      | 6.82      | 1.48      | 1.74      | 2.53      | 0.00 |
| Rib           | C00121 | 0.53      | 6.60      | 15.92     | 10.94     | 6.34      | 10.53     | 0.75 |
| S7P           | C05382 | 16.64     | 14.75     | 11.62     | 10.78     | 7.11      | 6.56      | 0.04 |
| SAM           | C00019 | 81.46     | 72.36     | 64.36     | 64.84     | 47.76     | 54.58     | 0.07 |
| Sarc          | C00213 | 3.72      | 3.46      | 2.81      | 4.05      | 1.76      | 1.50      | 0.36 |
| Ser           | C00065 | 15.43     | 14.82     | 11.43     | 11.18     | 7.81      | 8.63      | 0.04 |
| Sorbitol      | C00794 | 124179.59 | 122310.41 | 121639.19 | 134611.37 | 135776.79 | 132844.00 | 0.00 |
| Succ          | C00042 | 16.82     | 15.90     | 13.30     | 31.14     | 69.94     | 20.33     | 0.17 |
| Thr           | C00188 | 75.33     | 69.04     | 65.11     | 63.95     | 42.08     | 50.84     | 0.07 |
| Trp           | C00078 | 135.40    | 141.26    | 124.10    | 169.83    | 149.28    | 181.26    | 0.04 |
| Tyr           | C00082 | 299.54    | 304.97    | 258.65    | 315.63    | 263.54    | 319.82    | 0.63 |
| Tyramine      | C00483 | 3.98      | 3.46      | 3.34      | 3.56      | 2.77      | 2.86      | 0.17 |
| UDP           | C00015 | 16.57     | 19.67     | 20.45     | 2.79      | 2.91      | 3.84      | 0.00 |
| UDP-Glc       | C00029 | 0.68      | 0.49      | 0.18      | 0.97      | 0.83      | 0.69      | 0.08 |
| UDP-GlcNAc    | C00043 | 0.00      | 0.00      | 0.00      | 1.09      | 0.53      | 0.51      | 0.02 |
| UMP           | C00105 | 3.10      | 4.11      | 5.88      | 1.03      | 0.46      | 0.98      | 0.01 |
| Uracil        | C00106 | 12.00     | 39.24     | 16.70     | 13.68     | 3.83      | 20.30     | 0.36 |
| Uric Acid     | C00366 | 0.40      | 0.86      | 0.38      | 1.63      | 0.26      | 0.12      | 0.82 |
| Val           | C00183 | 432.94    | 511.05    | 412.53    | 399.86    | 440.24    | 481.00    | 0.77 |
| Vit-C         | C00072 | 0.82      | 0.80      | 0.60      | 1.50      | 1.24      | 0.65      | 0.21 |
| Xanthine      | C00385 | 0.08      | 0.00      | 0.19      | 1.95      | 0.11      | 0.04      | 0.39 |

**Table S2 (related to Figure 1). Metabolite levels in NB4 cells treated with PBS or R-2HG**

| Name                | KEGG.ID | PBS#1   | PBS#2   | PBS#3   | R-2HG#1  | R-2HG#2 | R-2HG#3 | p value |
|---------------------|---------|---------|---------|---------|----------|---------|---------|---------|
| 13BPG               | C00236  | 37.31   | 39.65   | 27.28   | 13.42    | 11.40   | 10.52   | 0.00    |
| 2-AB                | C02356  | 52.27   | 47.64   | 15.21   | 78.49    | 58.44   | 6.01    | 0.72    |
| 2-HG                | C02630  | 64.51   | 59.06   | 54.49   | 10201.33 | 9073.37 | 9478.78 | 0.00    |
| 2-KB                | C00109  | 0.05    | 0.18    | 0.00    | 0.11     | 0.06    | 0.17    | 0.61    |
| 2-Oxoadipate        | C00322  | 0.66    | 0.66    | 0.35    | 2.45     | 0.00    | 0.36    | 0.65    |
| 2-Oxosuccinamate    | C02362  | 0.05    | 0.07    | 0.00    | 0.09     | 0.05    | 0.00    | 0.85    |
| 3PG                 | C00197  | 19.48   | 16.21   | 13.86   | 14.26    | 12.16   | 14.72   | 0.20    |
| 4-OH-PheLac         | C03672  | 11.18   | 0.00    | 6.14    | 0.00     | 10.79   | 13.38   | 0.68    |
| 5M-adenosine        | C00170  | 932.22  | 1036.71 | 785.89  | 1088.84  | 818.14  | 215.62  | 0.48    |
| 5-Oxoproline        | C01879  | 604.97  | 746.33  | 632.00  | 916.52   | 614.92  | 749.90  | 0.37    |
| A                   | C00212  | 0.54    | 3.24    | 1.14    | 2.06     | 0.52    | 0.13    | 0.51    |
| Ac-carnitine        | C02571  | 195.55  | 1077.23 | 103.14  | 1130.00  | 121.81  | 2.54    | 0.94    |
| Ac-choline          | C01996  | 96.46   | 148.26  | 7.33    | 151.00   | 55.08   | 1.55    | 0.82    |
| Acetyl-CoA          | C00024  | 0.00    | 0.01    | 0.00    | 0.00     | 0.00    | 0.00    | 0.32    |
| Aconitate           | C00417  | 28.59   | 30.06   | 22.87   | 21.77    | 22.40   | 27.70   | 0.33    |
| Adenine             | C00147  | 1.17    | 3.98    | 0.56    | 1.94     | 0.82    | 0.11    | 0.47    |
| ADP                 | C00008  | 157.22  | 151.60  | 152.57  | 159.64   | 156.62  | 147.98  | 0.82    |
| ADP/ATP             | NA      | 0.33    | 0.34    | 0.42    | 0.41     | 0.50    | 0.40    | 0.16    |
| a-KG                | C00026  | 114.33  | 97.99   | 67.44   | 40.70    | 53.77   | 47.02   | 0.03    |
| Ala                 | C00041  | 33.42   | 1141.29 | 0.17    | 736.85   | 8.73    | 0.00    | 0.77    |
| AMP                 | C00020  | 1.39    | 4.38    | 0.00    | 8.56     | 1.36    | 1.02    | 0.57    |
| AMP/ATP             | NA      | 0.00    | 0.01    | 0.00    | 0.02     | 0.00    | 0.00    | 0.46    |
| Arg                 | C00062  | 1287.11 | 2576.70 | 756.42  | 2863.55  | 169.60  | 0.00    | 0.65    |
| Arg-Succ            | C03406  | 8.42    | 9.21    | 7.76    | 6.77     | 4.57    | 6.27    | 0.03    |
| Asn                 | C00152  | 1647.88 | 1815.07 | 1575.91 | 1789.90  | 1390.37 | 1599.81 | 0.56    |
| Asp                 | C00049  | 2074.48 | 1992.78 | 1721.86 | 1107.35  | 1095.17 | 945.02  | 0.00    |
| ATP                 | C00002  | 476.82  | 450.93  | 361.48  | 386.13   | 310.96  | 370.81  | 0.15    |
| C                   | D07769  | 45.65   | 75.27   | 30.62   | 36.15    | 10.13   | 2.60    | 0.11    |
| Carbamoyl-Asp       | C00438  | 0.63    | 0.47    | 0.00    | 0.57     | 0.30    | 0.26    | 0.97    |
| Carnitine           | C00318  | 738.75  | 767.50  | 450.59  | 893.59   | 522.31  | 8.80    | 0.56    |
| CDP                 | C00112  | 21.41   | 19.19   | 20.78   | 17.53    | 15.00   | 15.49   | 0.01    |
| CDP-choline         | C00307  | 2.55    | 2.64    | 0.19    | 5.42     | 1.96    | 1.15    | 0.53    |
| CDP-EtA             | C00570  | 6.36    | 7.46    | 6.07    | 7.15     | 6.63    | 7.33    | 0.44    |
| Choline             | C00114  | 1599.60 | 1330.39 | 652.00  | 4295.20  | 2692.16 | 0.18    | 0.43    |
| Cit                 | C00158  | 1865.58 | 1525.75 | 1538.69 | 1071.58  | 1306.96 | 1305.19 | 0.04    |
| Citrulline          | C00327  | 0.00    | 0.00    | 0.00    | 1.59     | 0.95    | 0.00    | 0.14    |
| CMP                 | C00055  | 2.56    | 1.86    | 3.62    | 2.54     | 2.59    | 3.24    | 0.85    |
| CoA                 | C00010  | 6.12    | 7.71    | 6.71    | 11.42    | 9.05    | 11.62   | 0.02    |
| Creatine            | C00300  | 188.86  | 567.42  | 0.64    | 716.66   | 192.64  | 1.58    | 0.86    |
| Creatine/P-Creatine | NA      | 63.28   | 47.79   | 0.00    | 97.09    | 219.12  | 0.00    | 0.36    |
| Creatinine          | C00791  | 5.98    | 15.19   | 3.28    | 17.95    | 8.36    | 0.13    | 0.92    |
| CTP                 | C00063  | 38.89   | 40.89   | 30.71   | 29.16    | 26.91   | 26.98   | 0.05    |
| Cystathionine       | C02291  | 8.31    | 11.38   | 1.07    | 11.47    | 3.07    | 1.28    | 0.73    |

|                |        |         |         |         |          |         |         |      |
|----------------|--------|---------|---------|---------|----------|---------|---------|------|
| Cytosine       | C00380 | 23.83   | 17.92   | 5.01    | 5.68     | 6.09    | 0.53    | 0.12 |
| dATP           | C00131 | 0.00    | 0.00    | 0.00    | 0.10     | 0.15    | 0.00    | 0.13 |
| dC             | C00881 | 1.55    | 0.26    | 0.47    | 0.22     | 0.13    | 0.48    | 0.31 |
| dCTP           | C00458 | 0.00    | 0.00    | 0.00    | 0.05     | 0.00    | 0.07    | 0.12 |
| dG             | C00330 | 0.14    | 0.76    | 0.05    | 0.06     | 0.00    | 0.05    | 0.28 |
| DMG            | C01026 | 11.42   | 12.78   | 1.95    | 20.27    | 3.94    | 2.73    | 0.97 |
| dTMP           | C00364 | 0.00    | 0.00    | 0.00    | 0.00     | 0.12    | 0.19    | 0.14 |
| dTTP           | C00459 | 0.00    | 0.28    | 0.00    | 0.17     | 0.16    | 0.00    | 0.91 |
| Folate         | C00504 | 0.23    | 0.28    | 0.58    | 0.23     | 0.48    | 0.13    | 0.64 |
| Fru            | C00095 | 6.91    | 10.46   | 10.14   | 17.18    | 10.56   | 15.93   | 0.08 |
| Fum            | C00122 | 131.60  | 120.30  | 115.08  | 89.30    | 65.60   | 74.66   | 0.01 |
| G              | C00387 | 4.04    | 0.40    | 5.21    | 0.21     | 4.65    | 5.37    | 0.93 |
| G3P            | C00118 | 11.02   | 11.26   | 8.07    | 9.02     | 9.73    | 11.03   | 0.88 |
| G6P-F6P        | C00085 | 143.80  | 179.94  | 106.27  | 174.74   | 152.82  | 171.10  | 0.36 |
| GABA           | C00334 | 52.27   | 47.63   | 15.21   | 78.49    | 58.43   | 6.01    | 0.72 |
| GDP            | C00035 | 15.11   | 13.56   | 16.37   | 15.23    | 14.35   | 14.82   | 0.82 |
| g-GluCys       | C00669 | 0.13    | 0.00    | 0.22    | 0.15     | 0.11    | 0.13    | 0.83 |
| Glc            | C00031 | 135.75  | 197.33  | 167.31  | 208.49   | 117.58  | 138.44  | 0.73 |
| GlcA           | C00257 | 2287.06 | 2627.71 | 2266.79 | 2392.15  | 1938.71 | 2214.08 | 0.30 |
| GlcN           | C00329 | 0.82    | 8.27    | 2.87    | 11.77    | 1.84    | 0.74    | 0.86 |
| GlcN-6P        | C00352 | 0.09    | 0.09    | 0.00    | 0.06     | 0.12    | 0.00    | 0.97 |
| GlcNAc         | C00140 | 1.90    | 6.18    | 0.90    | 4.95     | 1.40    | 1.03    | 0.81 |
| GlcNAc-6P      | C00357 | 1.74    | 1.70    | 0.69    | 2.75     | 3.64    | 3.10    | 0.01 |
| Gln            | C00064 | 6825.73 | 7555.00 | 6646.44 | 8175.22  | 6667.81 | 6918.17 | 0.68 |
| Glu            | C00025 | 7453.11 | 7529.96 | 6104.27 | 3516.80  | 3091.03 | 3218.72 | 0.00 |
| GlucA          | C00191 | 30.96   | 35.09   | 27.05   | 32.12    | 25.89   | 29.29   | 0.55 |
| Gly            | C00037 | 7.14    | 371.84  | 5.10    | 396.22   | 5.40    | 0.21    | 0.98 |
| Glycerol       | C00116 | 289.23  | 144.99  | 165.60  | 150.63   | 199.61  | 160.78  | 0.57 |
| Glycerol-3-P   | C00093 | 1177.72 | 1155.75 | 958.16  | 533.11   | 491.27  | 489.89  | 0.00 |
| GMP            | C00144 | 4.03    | 6.01    | 4.66    | 6.32     | 4.25    | 5.06    | 0.73 |
| GSH            | C00051 | 0.27    | 316.06  | 0.93    | 0.29     | 0.13    | 0.00    | 0.37 |
| GSH/GSSG       | NA     | 0.00    | 3.73    | 0.01    | 0.00     | 0.00    | 0.00    | 0.37 |
| GSSG           | C00127 | 122.95  | 84.83   | 89.09   | 87.96    | 75.54   | 78.44   | 0.22 |
| His            | C00135 | 82.12   | 720.77  | 17.47   | 945.85   | 31.45   | 0.00    | 0.90 |
| Homocysteine   | C00155 | 2.11    | 29.07   | 0.35    | 5.93     | 1.67    | 0.00    | 0.45 |
| HS2O3          | C00320 | 9.50    | 7.44    | 7.59    | 8.14     | 8.78    | 7.18    | 0.87 |
| Hypoxanthine   | C00262 | 1.71    | 58.39   | 0.89    | 10.88    | 0.48    | 0.00    | 0.44 |
| IMP            | C00130 | 4.04    | 2.97    | 1.48    | 5.18     | 2.46    | 3.33    | 0.49 |
| Inosine        | C00294 | 0.78    | 3.69    | 0.88    | 0.69     | 0.13    | 0.00    | 0.20 |
| Inositol       | C00137 | 1231.75 | 1163.62 | 991.76  | 1617.08  | 1229.24 | 1438.72 | 0.09 |
| Isobutyryl-CoA | C00630 | 0.11    | 0.07    | 0.09    | 0.07     | 0.08    | 0.08    | 0.41 |
| Lac            | C00186 | 617.08  | 899.33  | 503.29  | 842.31   | 517.73  | 646.30  | 0.98 |
| Leu/Ile        | C00123 | 6901.06 | 8000.01 | 4512.72 | 10745.08 | 6104.91 | 247.09  | 0.82 |
| Lys            | C00047 | 52.08   | 80.19   | 0.35    | 88.50    | 42.95   | 0.00    | 0.99 |
| Mal            | C00149 | 2005.38 | 1804.23 | 1726.39 | 1272.69  | 989.49  | 1069.35 | 0.00 |
| Met            | C00073 | 638.80  | 890.22  | 35.12   | 1245.19  | 109.82  | 3.03    | 0.89 |
| NAD+           | C00003 | 1.86    | 3.72    | 1.86    | 8.35     | 5.31    | 4.52    | 0.05 |
| NADP+          | C00006 | 0.00    | 0.00    | 0.00    | 0.00     | 0.05    | 0.14    | 0.20 |

|               |        |           |           |           |           |           |           |      |
|---------------|--------|-----------|-----------|-----------|-----------|-----------|-----------|------|
| Nicotinamide  | C00153 | 380.51    | 317.54    | 210.40    | 537.57    | 471.08    | 0.17      | 0.86 |
| Ornithine     | C00077 | 9.13      | 16.68     | 0.36      | 19.42     | 5.12      | 0.60      | 0.96 |
| Orotate       | C00295 | 7.14      | 18.02     | 9.73      | 8.20      | 3.82      | 3.44      | 0.15 |
| Orotidine     | X00006 | 40.41     | 43.00     | 32.94     | 44.62     | 32.20     | 38.25     | 0.93 |
| Palmitate     | C00249 | 6888.02   | 6838.06   | 7138.03   | 7628.37   | 7192.50   | 7258.02   | 0.07 |
| Pantothenate  | C00864 | 769.13    | 978.59    | 798.50    | 558.20    | 397.23    | 516.62    | 0.01 |
| P-Choline     | C00588 | 5139.74   | 9362.07   | 8.50      | 5610.70   | 917.33    | 40.86     | 0.46 |
| P-Creatine    | C02305 | 2.98      | 11.87     | 0.00      | 7.38      | 0.88      | 0.00      | 0.63 |
| PEP           | C00074 | 3.43      | 3.11      | 2.29      | 1.64      | 0.93      | 2.54      | 0.10 |
| P-EtA         | C00346 | 23.70     | 26.83     | 21.87     | 47.41     | 38.58     | 44.49     | 0.00 |
| Phe           | C00079 | 831.69    | 1876.92   | 0.10      | 2621.69   | 790.36    | 0.13      | 0.82 |
| Pipecolate    | C00408 | 7.15      | 11.96     | 2.21      | 12.01     | 2.79      | 0.00      | 0.66 |
| PO4           | C00009 | 100.90    | 101.38    | 93.15     | 102.92    | 87.04     | 91.74     | 0.45 |
| PPi           | C00013 | 10.08     | 11.34     | 7.03      | 7.14      | 5.94      | 6.72      | 0.10 |
| Pro           | C00148 | 11293.95  | 11603.59  | 5911.16   | 12686.20  | 8274.32   | 1077.14   | 0.59 |
| Pro-OH        | C01157 | 243.89    | 3182.28   | 28.57     | 3035.16   | 86.18     | 1.31      | 0.94 |
| Propanoyl-CoA | C00100 | 0.00      | 0.00      | 0.00      | 0.00      | 0.00      | 0.00      | 0.12 |
| PRPP          | C00119 | 0.50      | 0.53      | 0.51      | 0.43      | 0.90      | 1.10      | 0.21 |
| P-Ser         | C01005 | 15.65     | 5.35      | 7.39      | 3.17      | 6.62      | 3.58      | 0.21 |
| R5P           | C00117 | 6.51      | 6.03      | 5.36      | 6.83      | 6.39      | 6.39      | 0.19 |
| Rib           | C00121 | 18.76     | 14.02     | 17.22     | 21.22     | 18.80     | 19.28     | 0.12 |
| S7P           | C05382 | 27.41     | 26.87     | 17.80     | 47.57     | 34.95     | 39.86     | 0.03 |
| SAM           | C00019 | 158.12    | 185.69    | 138.32    | 224.42    | 194.52    | 156.94    | 0.26 |
| Sarc          | C00213 | 3.77      | 67.71     | 0.74      | 2.55      | 0.91      | 0.00      | 0.35 |
| Ser           | C00065 | 93.39     | 76.84     | 71.20     | 86.12     | 78.05     | 81.34     | 0.86 |
| Sorbitol      | C00794 | 182805.95 | 159637.33 | 151888.97 | 152098.24 | 154423.19 | 139828.31 | 0.20 |
| Succ          | C00042 | 37.39     | 36.50     | 33.02     | 20.47     | 12.92     | 14.17     | 0.00 |
| T             | C00214 | 0.16      | 0.42      | 0.23      | 0.05      | 0.05      | 0.07      | 0.05 |
| Thr           | C00188 | 543.10    | 757.93    | 39.88     | 806.00    | 60.83     | 0.00      | 0.66 |
| Thymine       | C00178 | 0.72      | 0.55      | 0.70      | 0.75      | 0.13      | 0.75      | 0.62 |
| Trp           | C00078 | 211.34    | 350.70    | 38.90     | 523.62    | 60.85     | 1.86      | 0.98 |
| Tyr           | C00082 | 14.15     | 778.23    | 5.47      | 1014.63   | 4.79      | 1.66      | 0.87 |
| Tyramine      | C00483 | 3.71      | 4.14      | 0.63      | 4.63      | 3.70      | 0.57      | 0.94 |
| U             | C00299 | 0.16      | 0.07      | 0.06      | 0.00      | 0.00      | 0.00      | 0.04 |
| UDP           | C00015 | 60.89     | 56.24     | 65.18     | 60.93     | 48.96     | 56.10     | 0.28 |
| UDP-Glc       | C00029 | 2.14      | 1.68      | 2.23      | 2.62      | 2.38      | 2.47      | 0.06 |
| UDP-GlcNAc    | C00043 | 21.93     | 1.51      | 48.46     | 1.57      | 32.12     | 54.56     | 0.80 |
| UMP           | C00105 | 34.13     | 21.47     | 26.11     | 27.71     | 23.11     | 27.33     | 0.78 |
| Uracil        | C00106 | 14.42     | 17.28     | 14.28     | 8.85      | 3.52      | 5.00      | 0.01 |
| Val           | C00183 | 1786.44   | 1577.50   | 210.03    | 2034.13   | 1281.08   | 0.00      | 0.92 |
| Vit-C         | C00072 | 0.00      | 0.00      | 0.00      | 0.33      | 0.19      | 0.00      | 0.14 |
| Xanthine      | C00385 | 0.00      | 0.00      | 0.00      | 0.35      | 0.12      | 0.06      | 0.12 |

**Table S3 (related to Figure S1). Metabolite levels in NOMO-1 IDH1<sup>R132H</sup> cells treated with PBS or doxycycline**

| Name                | KEGG.ID | -Dox#1 | -Dox#2 | -Dox#3 | +Dox#1  | +Dox#2  | +Dox#3  | p value |
|---------------------|---------|--------|--------|--------|---------|---------|---------|---------|
| 13BPG               | C00236  | 12.33  | 19.39  | 12.46  | 1.18    | 0.50    | 1.22    | 0.00    |
| 2-AB                | C02356  | 0.00   | 113.79 | 88.69  | 1.51    | 110.99  | 58.09   | 0.83    |
| 2-HG                | C02630  | 196.37 | 222.58 | 196.79 | 3476.87 | 3979.21 | 3520.09 | 0.00    |
| 2-Oxoadipate        | C00322  | 0.59   | 0.09   | 0.25   | 0.88    | 0.29    | 1.64    | 0.21    |
| 2-Oxosuccinamate    | C02362  | 0.05   | 0.00   | 0.09   | 0.05    | 0.11    | 0.15    | 0.24    |
| 3PG                 | C00197  | 19.52  | 23.51  | 20.63  | 6.13    | 7.05    | 7.24    | 0.00    |
| 5-Oxoproline        | C01879  | 545.25 | 653.36 | 568.32 | 572.93  | 429.35  | 628.56  | 0.54    |
| 5M-adenosine        | C00170  | 74.40  | 270.25 | 205.52 | 100.22  | 186.08  | 140.20  | 0.55    |
| A                   | C00212  | 0.61   | 0.39   | 0.76   | 0.23    | 1.34    | 1.68    | 0.33    |
| a-KG                | C00026  | 200.01 | 305.42 | 247.41 | 70.41   | 89.26   | 65.74   | 0.00    |
| Ac-carnitine        | C02571  | 0.22   | 2.60   | 1.44   | 0.08    | 49.92   | 70.30   | 0.14    |
| Ac-choline          | C01996  | 0.59   | 21.55  | 2.85   | 0.55    | 28.27   | 26.31   | 0.42    |
| Acetoacetyl-CoA     | C00332  | 0.03   | 0.08   | 0.04   | 0.02    | 0.03    | 0.01    | 0.11    |
| Acetyl-CoA          | C00024  | 0.12   | 0.09   | 0.07   | 0.02    | 0.02    | 0.01    | 0.00    |
| Aconitate           | C00417  | 0.51   | 1.02   | 0.93   | 0.35    | 0.58    | 0.69    | 0.20    |
| Adenine             | C00147  | 0.00   | 0.27   | 0.10   | 0.12    | 1.79    | 2.81    | 0.14    |
| ADP                 | C00008  | 43.44  | 67.82  | 57.46  | 39.83   | 46.19   | 35.68   | 0.11    |
| ADP/ATP             | NA      | 0.24   | 0.24   | 0.28   | 0.29    | 0.27    | 0.27    | 0.17    |
| Ala                 | C00041  | 0.08   | 4.69   | 0.28   | 0.09    | 148.92  | 94.86   | 0.14    |
| AMP                 | C00020  | 0.20   | 0.11   | 0.00   | 0.00    | 0.25    | 8.93    | 0.37    |
| AMP/ATP             | NA      | 0.00   | 0.00   | 0.00   | 0.00    | 0.00    | 0.07    | 0.37    |
| Arg                 | C00062  | 800.71 | 243.31 | 4.00   | 6.84    | 777.35  | 964.42  | 0.57    |
| Arg-Succ            | C03406  | 2.25   | 2.69   | 2.48   | 2.96    | 2.92    | 2.50    | 0.18    |
| Asn                 | C00152  | 442.92 | 626.27 | 555.31 | 455.49  | 450.60  | 462.66  | 0.19    |
| Asp                 | C00049  | 191.89 | 254.01 | 217.76 | 189.48  | 231.64  | 173.46  | 0.41    |
| ATP                 | C00002  | 178.63 | 278.26 | 207.64 | 139.60  | 168.29  | 134.00  | 0.08    |
| C                   | D07769  | 0.74   | 2.10   | 0.44   | 0.19    | 0.44    | 0.08    | 0.18    |
| Carbamoyl-Asp       | C00438  | 3.17   | 3.81   | 1.87   | 0.00    | 0.00    | 0.00    | 0.01    |
| Carnitine           | C00318  | 4.95   | 324.50 | 105.52 | 0.00    | 261.18  | 208.45  | 0.93    |
| CDP                 | C00112  | 2.20   | 3.98   | 3.49   | 1.32    | 2.18    | 2.20    | 0.09    |
| CDP-choline         | C00307  | 1.02   | 0.00   | 0.73   | 0.00    | 0.44    | 1.07    | 0.87    |
| CDP-EtA             | C00570  | 10.99  | 13.86  | 12.40  | 7.13    | 8.46    | 6.93    | 0.01    |
| Choline             | C00114  | 29.39  | 50.43  | 56.07  | 23.88   | 244.72  | 155.25  | 0.21    |
| Cit                 | C00158  | 48.55  | 108.82 | 90.58  | 58.10   | 80.65   | 57.16   | 0.42    |
| Citrulline          | C00327  | 0.00   | 0.00   | 0.00   | 0.00    | 0.16    | 0.12    | 0.12    |
| CMP                 | C00055  | 0.33   | 0.42   | 0.24   | 0.25    | 0.23    | 0.16    | 0.12    |
| CoA                 | C00010  | 4.93   | 7.19   | 5.53   | 2.27    | 2.12    | 2.54    | 0.01    |
| Creatine            | C00300  | 0.66   | 59.62  | 16.37  | 0.53    | 1756.59 | 1044.35 | 0.15    |
| Creatine/P-Creatine | NA      | 0.02   | 4.29   | 19.80  | 0.00    | 58.71   | 25.36   | 0.33    |
| Creatinine          | C00791  | 0.00   | 0.11   | 0.04   | 0.38    | 11.85   | 0.00    | 0.36    |
| CTP                 | C00063  | 14.40  | 24.37  | 17.68  | 9.13    | 9.20    | 8.60    | 0.03    |
| Cytosine            | C00380  | 0.04   | 0.25   | 0.05   | 0.00    | 0.07    | 0.06    | 0.37    |

|                 |        |         |         |         |         |         |         |      |
|-----------------|--------|---------|---------|---------|---------|---------|---------|------|
| dATP            | C00131 | 2.05    | 4.29    | 3.19    | 1.77    | 1.52    | 1.25    | 0.07 |
| dC              | C00881 | 0.31    | 0.88    | 0.00    | 0.00    | 0.00    | 0.00    | 0.20 |
| dCMP            | C00239 | 0.08    | 0.00    | 0.05    | 0.00    | 0.00    | 0.00    | 0.13 |
| dCTP            | C00458 | 0.07    | 0.14    | 0.15    | 0.06    | 0.10    | 0.05    | 0.16 |
| dG              | C00330 | 0.00    | 0.00    | 0.00    | 0.00    | 0.06    | 0.35    | 0.27 |
| dGDP            | C00361 | 185.97  | 265.70  | 213.14  | 149.49  | 165.68  | 138.48  | 0.05 |
| DHAP            | C00111 | 1.22    | 2.89    | 2.24    | 1.09    | 1.87    | 1.10    | 0.24 |
| Dihydrooorotate | C00337 | 0.65    | 0.77    | 0.62    | 0.00    | 0.00    | 0.00    | 0.00 |
| DMG             | C01026 | 1.94    | 6.97    | 72.48   | 1.84    | 21.60   | 7.38    | 0.51 |
| dTMP            | C00364 | 0.00    | 0.05    | 0.21    | 0.00    | 0.00    | 0.00    | 0.24 |
| dTTP            | C00459 | 0.54    | 0.95    | 0.83    | 0.26    | 0.12    | 0.17    | 0.01 |
| F16BP           | C00354 | 82.81   | 104.97  | 105.48  | 64.36   | 57.63   | 56.30   | 0.01 |
| Folate          | C00504 | 0.15    | 0.13    | 0.24    | 0.36    | 0.11    | 0.35    | 0.31 |
| Fru             | C00095 | 5.42    | 5.83    | 3.72    | 7.18    | 3.28    | 8.40    | 0.48 |
| Fum             | C00122 | 84.20   | 112.35  | 94.89   | 56.99   | 64.36   | 57.68   | 0.01 |
| G               | C00387 | 1.99    | 2.57    | 9.45    | 2.69    | 3.47    | 0.10    | 0.38 |
| G3P             | C00118 | 8.64    | 13.98   | 12.58   | 6.07    | 7.85    | 5.61    | 0.04 |
| G6P-F6P         | C00085 | 73.37   | 108.01  | 88.15   | 57.91   | 62.23   | 64.93   | 0.05 |
| GABA            | C00334 | 1.27    | 121.47  | 90.33   | 0.00    | 113.03  | 62.34   | 0.81 |
| GDP             | C00035 | 3.11    | 4.97    | 4.01    | 2.86    | 2.46    | 2.15    | 0.06 |
| Glc             | C00031 | 77.57   | 103.69  | 97.46   | 122.11  | 105.72  | 137.58  | 0.08 |
| GlcA            | C00257 | 624.76  | 798.18  | 707.63  | 265.30  | 240.06  | 282.01  | 0.00 |
| GlcN            | C00329 | 0.47    | 0.87    | 0.67    | 0.33    | 4.56    | 3.33    | 0.18 |
| GlcN-6P         | C00352 | 0.17    | 0.12    | 0.04    | 0.11    | 0.14    | 0.05    | 0.85 |
| GlcNAc          | C00140 | 0.68    | 2.27    | 1.45    | 0.34    | 1.31    | 3.88    | 0.76 |
| GlcNAc-6P       | C00357 | 0.20    | 0.66    | 0.74    | 1.75    | 1.35    | 1.17    | 0.02 |
| Gln             | C00064 | 1195.90 | 1435.24 | 1423.49 | 2310.27 | 2084.45 | 2181.26 | 0.00 |
| Glu             | C00025 | 2282.74 | 3117.34 | 2710.01 | 1575.78 | 1769.12 | 1522.85 | 0.01 |
| GlucA           | C00191 | 27.39   | 38.08   | 29.01   | 21.50   | 20.86   | 18.12   | 0.03 |
| Gly             | C00037 | 0.00    | 0.83    | 1.48    | 0.00    | 48.94   | 90.09   | 0.16 |
| Glycerol        | C00116 | 149.16  | 212.65  | 150.03  | 149.60  | 408.84  | 140.53  | 0.53 |
| Glycerol-3-P    | C00093 | 7.42    | 8.40    | 6.52    | 11.42   | 11.33   | 11.90   | 0.00 |
| GMP             | C00144 | 0.19    | 0.62    | 0.22    | 0.11    | 0.07    | 0.22    | 0.22 |
| GSH             | C00051 | 119.34  | 2.10    | 2.19    | 1.88    | 27.59   | 51.28   | 0.75 |
| GSH/GSSG        | NA     | 1.17    | 0.02    | 0.02    | 0.02    | 0.29    | 0.55    | 0.79 |
| GSSG            | C00127 | 101.91  | 119.07  | 118.97  | 103.23  | 95.59   | 92.74   | 0.07 |
| His             | C00135 | 79.51   | 6.94    | 0.00    | 0.00    | 29.71   | 190.63  | 0.53 |
| HMG-CoA         | C00356 | 0.04    | 0.01    | 0.02    | 0.01    | 0.00    | 0.00    | 0.10 |
| HS2O3           | C00320 | 5.98    | 7.11    | 11.26   | 6.41    | 7.73    | 5.84    | 0.44 |
| IMP             | C00130 | 0.40    | 0.79    | 0.69    | 0.42    | 0.37    | 0.64    | 0.35 |
| Inosine         | C00294 | 0.00    | 0.24    | 0.00    | 0.00    | 0.00    | 0.13    | 0.71 |
| Inositol        | C00137 | 367.10  | 484.68  | 448.17  | 624.29  | 750.31  | 632.72  | 0.01 |
| Isobutyryl-CoA  | C00630 | 0.06    | 0.11    | 0.08    | 0.04    | 0.06    | 0.02    | 0.07 |
| Lac             | C00186 | 615.32  | 867.71  | 738.36  | 473.30  | 566.69  | 489.07  | 0.04 |
| Leu/Ile         | C00123 | 77.04   | 1273.75 | 630.87  | 276.10  | 2062.53 | 2662.13 | 0.27 |
| Lys             | C00047 | 23.97   | 8.09    | 6.48    | 0.70    | 27.22   | 37.60   | 0.51 |
| Mal             | C00149 | 1360.69 | 1820.07 | 1519.05 | 897.98  | 1027.99 | 878.79  | 0.01 |
| Met             | C00073 | 0.00    | 25.68   | 16.67   | 1.81    | 329.67  | 347.43  | 0.13 |



|              |        |          |           |           |          |           |           |      |
|--------------|--------|----------|-----------|-----------|----------|-----------|-----------|------|
| NAD+         | C00003 | 1.97     | 3.61      | 3.22      | 3.32     | 5.61      | 2.63      | 0.42 |
| NADP+        | C00006 | 0.00     | 0.09      | 0.06      | 0.00     | 0.07      | 0.07      | 0.93 |
| Nicotinamide | C00153 | 0.00     | 82.37     | 39.27     | 21.02    | 107.74    | 78.83     | 0.46 |
| Ornithine    | C00077 | 5.38     | 2.16      | 3.35      | 1.19     | 9.10      | 6.17      | 0.50 |
| Orotate      | C00295 | 0.87     | 2.54      | 3.05      | 0.00     | 0.00      | 0.00      | 0.03 |
| Orotidine    | X00006 | 58.33    | 76.76     | 67.82     | 35.38    | 39.08     | 37.99     | 0.01 |
| P-Choline    | C00588 | 6073.31  | 2338.98   | 4052.02   | 1.22     | 3618.23   | 3347.61   | 0.31 |
| P-Creatine   | C02305 | 27.89    | 13.91     | 0.83      | 0.00     | 29.92     | 41.18     | 0.55 |
| P-EtA        | C00346 | 13.78    | 16.56     | 15.54     | 132.33   | 139.69    | 130.31    | 0.00 |
| P-Ser        | C01005 | 2.55     | 6.56      | 4.47      | 2.12     | 4.14      | 1.29      | 0.23 |
| Palmitate    | C00249 | 6281.93  | 6054.96   | 10686.16  | 6590.43  | 6591.04   | 8286.18   | 0.76 |
| Pantothenate | C00864 | 145.96   | 190.09    | 149.66    | 103.35   | 83.88     | 102.58    | 0.01 |
| PEP          | C00074 | 3.00     | 3.17      | 2.51      | 0.21     | 0.36      | 1.07      | 0.00 |
| Phe          | C00079 | 0.00     | 25.11     | 1.49      | 0.95     | 487.59    | 578.31    | 0.13 |
| Pipecolate   | C00408 | 3.34     | 1.37      | 0.54      | 0.00     | 3.82      | 5.05      | 0.52 |
| PO4          | C00009 | 59.76    | 78.11     | 64.78     | 54.47    | 55.67     | 55.50     | 0.09 |
| PPi          | C00013 | 7.11     | 9.77      | 6.32      | 4.18     | 0.00      | 2.07      | 0.02 |
| Pro          | C00148 | 0.25     | 3788.22   | 1350.19   | 66.31    | 3565.70   | 2355.08   | 0.86 |
| Pro-OH       | C01157 | 0.87     | 247.98    | 6.75      | 0.14     | 746.99    | 544.35    | 0.22 |
| PRPP         | C00119 | 6.42     | 11.13     | 7.93      | 1.09     | 1.27      | 1.28      | 0.01 |
| Pyr          | C00022 | 0.28     | 0.56      | 0.50      | 0.00     | 0.00      | 0.00      | 0.01 |
| R5P          | C00117 | 0.80     | 2.08      | 0.84      | 1.74     | 1.42      | 1.98      | 0.35 |
| Rib          | C00121 | 13.06    | 18.94     | 17.84     | 20.14    | 20.34     | 14.14     | 0.59 |
| S7P          | C05382 | 18.80    | 27.02     | 24.43     | 14.28    | 18.06     | 14.30     | 0.04 |
| SAM          | C00019 | 22.60    | 54.23     | 37.22     | 28.94    | 32.03     | 32.77     | 0.50 |
| Sarc         | C00213 | 0.00     | 0.69      | 0.42      | 0.00     | 8.87      | 16.35     | 0.16 |
| Ser          | C00065 | 27.53    | 37.90     | 33.64     | 25.56    | 32.83     | 22.98     | 0.23 |
| Sorbitol     | C00794 | 52292.39 | 113190.28 | 103857.63 | 92246.39 | 126376.02 | 100401.26 | 0.49 |
| Succ         | C00042 | 14.12    | 17.23     | 16.60     | 5.73     | 6.85      | 5.73      | 0.00 |
| T            | C00214 | 0.22     | 0.09      | 0.00      | 0.19     | 0.08      | 0.07      | 0.90 |
| Thr          | C00188 | 1.96     | 9.11      | 3.84      | 0.00     | 203.77    | 157.43    | 0.13 |
| Thymine      | C00178 | 0.11     | 0.21      | 0.08      | 0.08     | 0.21      | 0.10      | 0.91 |
| Trp          | C00078 | 0.00     | 18.71     | 3.11      | 0.87     | 98.59     | 113.04    | 0.15 |
| Tyr          | C00082 | 0.10     | 1.04      | 1.61      | 0.24     | 97.84     | 224.13    | 0.18 |
| Tyramine     | C00483 | 0.00     | 1.58      | 3.47      | 0.23     | 2.96      | 2.98      | 0.80 |
| U            | C00299 | 55.55    | 32.88     | 21.81     | 20.20    | 24.58     | 12.94     | 0.17 |
| UDP          | C00015 | 8.67     | 15.96     | 12.55     | 7.82     | 9.76      | 10.74     | 0.26 |
| UDP-Glc      | C00029 | 48.67    | 78.88     | 63.15     | 44.56    | 54.74     | 34.47     | 0.15 |
| UDP-GlcNAc   | C00043 | 0.58     | 5.23      | 19.81     | 14.48    | 5.49      | 1.84      | 0.86 |
| UMP          | C00105 | 11.16    | 14.79     | 12.85     | 9.83     | 11.88     | 8.72      | 0.12 |
| Uracil       | C00106 | 0.18     | 0.19      | 0.00      | 0.10     | 0.15      | 0.09      | 0.87 |
| Uric Acid    | C00366 | 0.00     | 0.00      | 0.00      | 0.10     | 0.00      | 0.15      | 0.13 |
| Val          | C00183 | 7.51     | 584.15    | 488.88    | 0.00     | 1317.64   | 944.11    | 0.41 |

Dox: doxycycline.

**Table S4 (related to Figure 3). Metabolite levels in NOMO-1 cells stably expressing shNS or shFTO-2**

| Name                | KEGG.ID | shNS#1  | shNS#2  | shNS#3  | shFTO-2#1 | shFTO-2#2 | shFTO-2#3 | p value |
|---------------------|---------|---------|---------|---------|-----------|-----------|-----------|---------|
| 13BPG               | C00236  | 0.29    | 0.68    | 1.63    | 0.11      | 0.00      | 0.06      | 0.11    |
| 2-AB                | C02356  | 3.47    | 4.97    | 4.33    | 5.00      | 3.43      | 6.26      | 0.53    |
| 2-HG                | C02630  | 139.35  | 137.22  | 146.61  | 153.43    | 172.89    | 161.74    | 0.03    |
| 2-Oxoadipate        | C00322  | 3.84    | 4.21    | 3.47    | 3.75      | 3.45      | 4.11      | 0.82    |
| 2-Oxosuccinamate    | C02362  | 0.00    | 0.13    | 0.07    | 0.07      | 0.08      | 0.15      | 0.49    |
| 3PG                 | C00197  | 9.54    | 7.98    | 10.54   | 5.66      | 6.80      | 9.55      | 0.22    |
| 4-OH-PheLac         | C03672  | 0.00    | 0.00    | 0.00    | 0.00      | 4.19      | 1.22      | 0.22    |
| 5-Oxoproline        | C01879  | 1046.51 | 1052.32 | 1377.71 | 970.79    | 997.67    | 1037.68   | 0.23    |
| 5M-adenosine        | C00170  | 57.47   | 39.49   | 63.27   | 48.21     | 52.13     | 58.09     | 0.94    |
| A                   | C00212  | 0.14    | 0.00    | 0.00    | 0.13      | 0.00      | 1.43      | 0.36    |
| a-KG                | C00026  | 70.36   | 52.55   | 72.62   | 53.76     | 53.27     | 61.51     | 0.26    |
| Ac-carnitine        | C02571  | 50.08   | 48.28   | 67.31   | 173.59    | 187.43    | 167.17    | 0.00    |
| Ac-choline          | C01996  | 28.56   | 26.23   | 36.06   | 16.69     | 19.69     | 20.38     | 0.02    |
| Acetyl-CoA          | C00024  | 0.11    | 0.07    | 0.15    | 0.05      | 0.07      | 0.05      | 0.09    |
| Aconitate           | C00417  | 3.49    | 2.83    | 5.49    | 3.19      | 3.45      | 3.93      | 0.64    |
| Adenine             | C00147  | 3.23    | 0.92    | 4.09    | 3.15      | 2.83      | 1.73      | 0.87    |
| ADP                 | C00008  | 26.89   | 30.80   | 29.64   | 29.06     | 28.50     | 33.71     | 0.55    |
| ADP/ATP             | NA      | 0.28    | 0.34    | 0.21    | 0.37      | 0.33      | 0.38      | 0.09    |
| Ala                 | C00041  | 264.54  | 249.41  | 367.94  | 108.56    | 168.87    | 147.01    | 0.02    |
| AMP                 | C00020  | 4.17    | 5.86    | 10.79   | 4.44      | 4.27      | 3.88      | 0.24    |
| AMP/ATP             | NA      | 0.04    | 0.06    | 0.08    | 0.06      | 0.05      | 0.04      | 0.34    |
| Arg                 | C00062  | 653.92  | 1021.04 | 1045.45 | 721.95    | 952.82    | 916.42    | 0.78    |
| Arg-Succ            | C03406  | 2.06    | 2.02    | 3.37    | 1.80      | 2.53      | 2.34      | 0.63    |
| Asn                 | C00152  | 347.85  | 344.00  | 442.00  | 330.80    | 371.47    | 370.50    | 0.59    |
| Asp                 | C00049  | 121.46  | 125.60  | 150.40  | 90.41     | 102.91    | 105.14    | 0.03    |
| ATP                 | C00002  | 96.75   | 91.36   | 138.84  | 78.65     | 85.32     | 89.47     | 0.19    |
| C                   | D07769  | 2.23    | 3.17    | 1.71    | 2.50      | 2.28      | 1.20      | 0.56    |
| Carbamoyl-Asp       | C00438  | 1.87    | 0.32    | 3.51    | 0.99      | 1.29      | 1.00      | 0.43    |
| Carnitine           | C00318  | 435.25  | 388.14  | 534.83  | 229.45    | 251.13    | 266.14    | 0.01    |
| CDP                 | C00112  | 0.70    | 1.07    | 1.14    | 1.52      | 1.15      | 2.78      | 0.18    |
| CDP-EtA             | C00570  | 11.94   | 9.52    | 14.40   | 15.05     | 15.94     | 16.47     | 0.06    |
| Choline             | C00114  | 37.44   | 56.13   | 39.75   | 62.18     | 80.01     | 67.90     | 0.03    |
| Cit                 | C00158  | 56.37   | 44.15   | 78.02   | 56.75     | 66.65     | 68.37     | 0.70    |
| Citrulline          | C00327  | 2.39    | 3.33    | 2.20    | 3.29      | 3.82      | 2.65      | 0.28    |
| CMP                 | C00055  | 0.81    | 1.46    | 1.48    | 0.58      | 0.04      | 0.46      | 0.03    |
| CoA                 | C00010  | 0.35    | 0.29    | 0.52    | 0.18      | 0.19      | 0.21      | 0.05    |
| Creatine            | C00300  | 579.11  | 526.08  | 710.82  | 752.36    | 912.48    | 826.06    | 0.04    |
| Creatine/P-Creatine | NA      | 20.36   | 17.75   | 20.41   | 22.48     | 23.28     | 19.40     | 0.21    |
| Creatinine          | C00791  | 20.19   | 24.43   | 22.13   | 23.40     | 29.43     | 23.95     | 0.22    |
| CTP                 | C00063  | 8.79    | 9.45    | 14.19   | 6.82      | 6.92      | 7.62      | 0.10    |
| Cytosine            | C00380  | 0.08    | 0.48    | 0.09    | 0.68      | 0.25      | 0.12      | 0.58    |
| dA                  | C00559  | 1.85    | 2.19    | 0.94    | 2.44      | 2.75      | 1.93      | 0.18    |

|                 |        |         |         |         |         |         |         |      |
|-----------------|--------|---------|---------|---------|---------|---------|---------|------|
| dATP            | C00131 | 1.99    | 1.15    | 2.52    | 0.89    | 0.97    | 1.15    | 0.10 |
| dCMP            | C00239 | 0.26    | 0.24    | 0.30    | 0.31    | 0.50    | 0.29    | 0.24 |
| dCTP            | C00458 | 0.14    | 0.08    | 0.12    | 0.00    | 0.05    | 0.13    | 0.31 |
| dG              | C00330 | 0.26    | 0.40    | 0.10    | 0.24    | 0.50    | 0.80    | 0.23 |
| DHAP            | C00111 | 1.43    | 0.94    | 1.67    | 2.21    | 2.05    | 2.87    | 0.04 |
| Dihydrooorotate | C00337 | 1.17    | 0.49    | 1.16    | 0.48    | 0.55    | 0.15    | 0.10 |
| DMG             | C01026 | 176.13  | 197.99  | 186.56  | 186.21  | 219.82  | 204.55  | 0.22 |
| dTMP            | C00364 | 0.00    | 0.52    | 0.44    | 0.21    | 0.07    | 0.15    | 0.35 |
| dTTP            | C00459 | 0.78    | 0.71    | 1.23    | 0.64    | 0.61    | 0.66    | 0.18 |
| dU              | C00526 | 0.00    | 0.00    | 0.00    | 0.12    | 0.18    | 0.93    | 0.19 |
| F16BP           | C00354 | 0.18    | 0.18    | 0.26    | 0.00    | 0.00    | 0.00    | 0.00 |
| Folate          | C00504 | 0.04    | 0.00    | 0.05    | 0.00    | 0.00    | 0.00    | 0.12 |
| Fru             | C00095 | 19.40   | 20.88   | 19.49   | 18.75   | 16.09   | 21.64   | 0.55 |
| Fum             | C00122 | 77.92   | 74.82   | 89.11   | 71.22   | 81.59   | 78.30   | 0.54 |
| G               | C00387 | 0.52    | 0.51    | 0.55    | 0.36    | 0.26    | 1.03    | 0.93 |
| G3P             | C00118 | 1.87    | 2.80    | 3.51    | 1.97    | 4.53    | 4.07    | 0.44 |
| G6P-F6P         | C00085 | 62.46   | 62.19   | 93.46   | 40.92   | 47.36   | 52.76   | 0.08 |
| GABA            | C00334 | 78.67   | 83.95   | 105.67  | 58.52   | 79.40   | 70.38   | 0.12 |
| GDP             | C00035 | 1.22    | 1.38    | 1.61    | 1.12    | 1.05    | 1.23    | 0.10 |
| Glc             | C00031 | 158.69  | 243.95  | 252.23  | 185.31  | 291.75  | 260.48  | 0.56 |
| GlcA            | C00257 | 644.79  | 642.63  | 596.42  | 640.29  | 644.20  | 641.81  | 0.42 |
| GlcN            | C00329 | 2.16    | 3.16    | 2.37    | 1.41    | 2.05    | 2.47    | 0.25 |
| GlcN-6P         | C00352 | 0.07    | 0.08    | 0.24    | 0.07    | 0.07    | 0.11    | 0.45 |
| GlcNAc          | C00140 | 10.15   | 8.98    | 9.99    | 6.73    | 12.68   | 11.61   | 0.75 |
| GlcNAc-6P       | C00357 | 1.91    | 1.38    | 2.49    | 1.56    | 1.68    | 2.15    | 0.74 |
| Gln             | C00064 | 591.31  | 759.16  | 847.59  | 1035.86 | 1250.52 | 1315.54 | 0.01 |
| Glu             | C00025 | 1537.25 | 1467.37 | 1909.10 | 1432.96 | 1574.35 | 1674.90 | 0.64 |
| GlucA           | C00191 | 21.52   | 18.17   | 24.62   | 15.52   | 14.05   | 16.26   | 0.04 |
| Gly             | C00037 | 64.16   | 89.86   | 84.32   | 59.80   | 80.06   | 71.58   | 0.41 |
| Glycerol        | C00116 | 3.49    | 6.35    | 4.98    | 4.91    | 5.65    | 3.48    | 0.82 |
| Glycerol-3-P    | C00093 | 6.07    | 5.40    | 7.54    | 7.79    | 7.95    | 9.93    | 0.08 |
| GMP             | C00144 | 0.19    | 0.57    | 0.69    | 0.34    | 0.31    | 0.33    | 0.36 |
| GSH             | C00051 | 61.07   | 465.00  | 141.81  | 686.10  | 1077.21 | 220.60  | 0.19 |
| GSH/GSSG        | NA     | 0.36    | 3.38    | 0.75    | 2.71    | 4.99    | 0.89    | 0.42 |
| GSSG            | C00127 | 169.35  | 137.71  | 188.91  | 253.60  | 215.84  | 248.84  | 0.02 |
| His             | C00135 | 67.99   | 90.39   | 105.94  | 66.24   | 87.71   | 84.47   | 0.54 |
| HMG-CoA         | C00356 | 0.01    | 0.02    | 0.01    | 0.01    | 0.02    | 0.00    | 0.86 |
| Homocysteine    | C00155 | 0.83    | 0.66    | 1.68    | 0.85    | 1.77    | 0.00    | 0.77 |
| HS2O3           | C00320 | 0.60    | 0.90    | 0.66    | 0.35    | 0.52    | 0.68    | 0.20 |
| Hypoxanthine    | C00262 | 0.21    | 0.68    | 1.29    | 0.65    | 1.69    | 0.00    | 0.93 |
| IMP             | C00130 | 0.49    | 0.23    | 0.49    | 2.75    | 2.85    | 4.46    | 0.01 |
| Inosine         | C00294 | 0.00    | 0.00    | 0.36    | 0.00    | 0.60    | 1.78    | 0.28 |
| Inositol        | C00137 | 287.87  | 236.18  | 310.44  | 379.34  | 447.91  | 469.48  | 0.01 |
| Isobutyryl-CoA  | C00630 | 0.01    | 0.01    | 0.01    | 0.00    | 0.00    | 0.01    | 0.25 |
| Lac             | C00186 | 489.34  | 527.74  | 734.94  | 332.09  | 435.85  | 478.56  | 0.13 |
| Leu/Ile         | C00123 | 1740.90 | 1982.48 | 2422.05 | 1652.32 | 2235.96 | 2150.72 | 0.90 |
| Lys             | C00047 | 27.02   | 48.55   | 45.11   | 34.78   | 47.65   | 41.86   | 0.88 |
| Mal             | C00149 | 1234.06 | 1169.08 | 1412.79 | 1157.79 | 1354.45 | 1258.56 | 0.88 |

|              |        |           |           |           |           |           |           |      |
|--------------|--------|-----------|-----------|-----------|-----------|-----------|-----------|------|
| Met          | C00073 | 173.97    | 206.64    | 262.39    | 170.36    | 202.98    | 215.60    | 0.57 |
| NAD+         | C00003 | 2.91      | 2.16      | 1.92      | 1.54      | 2.69      | 1.08      | 0.38 |
| Nicotinamide | C00153 | 43.44     | 53.00     | 55.89     | 30.64     | 44.92     | 72.58     | 0.92 |
| Ornithine    | C00077 | 12.58     | 23.20     | 22.99     | 16.35     | 23.00     | 18.25     | 0.93 |
| Orotate      | C00295 | 7.29      | 5.50      | 8.45      | 3.45      | 4.14      | 6.51      | 0.13 |
| Orotidine    | X00006 | 48.46     | 38.20     | 53.04     | 46.21     | 46.41     | 50.10     | 0.84 |
| P-Choline    | C00588 | 4563.98   | 4001.55   | 5531.76   | 3489.95   | 3877.18   | 3954.61   | 0.12 |
| P-Creatine   | C02305 | 28.45     | 29.63     | 34.83     | 33.47     | 39.19     | 42.59     | 0.09 |
| P-EtA        | C00346 | 28.46     | 24.25     | 32.37     | 133.34    | 140.45    | 149.87    | 0.00 |
| P-Ser        | C01005 | 2.99      | 4.87      | 4.65      | 4.15      | 6.61      | 6.38      | 0.19 |
| Palmitate    | C00249 | 9998.68   | 10433.86  | 9516.46   | 8999.89   | 14429.68  | 9764.64   | 0.56 |
| Pantothenate | C00864 | 282.50    | 315.21    | 385.63    | 324.54    | 361.35    | 391.99    | 0.43 |
| PEP          | C00074 | 1.10      | 1.19      | 1.51      | 0.47      | 0.63      | 1.35      | 0.20 |
| Phe          | C00079 | 391.08    | 430.49    | 567.75    | 363.45    | 431.65    | 440.36    | 0.43 |
| Pipecolate   | C00408 | 1.55      | 3.94      | 4.55      | 3.40      | 4.29      | 2.71      | 0.91 |
| PO4          | C00009 | 41.04     | 51.67     | 56.78     | 42.64     | 46.04     | 49.12     | 0.48 |
| PPi          | C00013 | 1.09      | 0.97      | 2.03      | 0.56      | 0.49      | 1.00      | 0.14 |
| Pro          | C00148 | 2393.49   | 2406.63   | 3152.28   | 1995.25   | 2501.86   | 2375.04   | 0.29 |
| Pro-OH       | C01157 | 470.71    | 501.74    | 614.55    | 423.38    | 618.64    | 507.40    | 0.87 |
| PRPP         | C00119 | 1.00      | 1.56      | 3.33      | 0.81      | 0.28      | 0.37      | 0.11 |
| Pyr          | C00022 | 0.34      | 1.24      | 1.52      | 0.74      | 1.34      | 0.62      | 0.78 |
| R5P          | C00117 | 1.73      | 1.85      | 4.22      | 1.17      | 1.94      | 3.31      | 0.68 |
| Rib          | C00121 | 6.43      | 8.95      | 8.38      | 7.64      | 5.69      | 6.05      | 0.21 |
| S7P          | C05382 | 18.26     | 16.64     | 23.82     | 18.82     | 20.87     | 21.47     | 0.74 |
| SAM          | C00019 | 58.90     | 59.01     | 79.24     | 63.84     | 70.67     | 72.07     | 0.69 |
| Sarc         | C00213 | 24.03     | 25.12     | 30.88     | 27.56     | 33.71     | 29.21     | 0.28 |
| Ser          | C00065 | 39.54     | 39.53     | 51.55     | 25.92     | 36.27     | 34.39     | 0.09 |
| Sorbitol     | C00794 | 145196.60 | 156391.10 | 148580.00 | 150414.88 | 157975.23 | 145209.67 | 0.83 |
| Succ         | C00042 | 34.96     | 37.10     | 39.18     | 41.63     | 46.90     | 42.33     | 0.03 |
| Succinyl-CoA | C00091 | 0.01      | 0.00      | 0.02      | 0.00      | 0.00      | 0.01      | 0.28 |
| T            | C00214 | 2.93      | 2.16      | 2.60      | 0.10      | 3.00      | 2.80      | 0.57 |
| Thr          | C00188 | 135.83    | 153.45    | 173.64    | 124.35    | 174.98    | 154.93    | 0.88 |
| Thymine      | C00178 | 0.50      | 0.33      | 0.25      | 4.55      | 0.98      | 6.22      | 0.08 |
| Trp          | C00078 | 69.05     | 73.15     | 98.57     | 64.98     | 75.27     | 83.56     | 0.62 |
| Tyr          | C00082 | 159.91    | 186.61    | 234.37    | 151.64    | 175.19    | 176.81    | 0.33 |
| Tyramine     | C00483 | 1.58      | 0.42      | 0.55      | 0.73      | 9.16      | 0.77      | 0.39 |
| U            | C00299 | 2.97      | 11.95     | 20.48     | 1.28      | 1.07      | 9.53      | 0.25 |
| UDP          | C00015 | 5.04      | 4.70      | 5.26      | 7.49      | 6.02      | 14.17     | 0.17 |
| UDP-Glc      | C00029 | 40.96     | 35.08     | 49.46     | 42.27     | 50.29     | 51.39     | 0.29 |
| UDP-GlcNAc   | C00043 | 2.91      | 2.85      | 1.51      | 2.19      | 1.68      | 2.74      | 0.71 |
| UMP          | C00105 | 9.74      | 10.48     | 14.32     | 8.08      | 13.21     | 9.03      | 0.54 |
| Uracil       | C00106 | 9.81      | 9.22      | 9.77      | 11.81     | 10.09     | 11.49     | 0.05 |
| Uric Acid    | C00366 | 0.24      | 0.30      | 0.52      | 0.57      | 0.15      | 0.30      | 0.94 |

**Table S5 (related to Figure 4). List of the 35 glycolysis- and gluconeogenesis-related genes**

| <b>Symbol</b> | <b>Full Name</b>                                        |
|---------------|---------------------------------------------------------|
| ALDOA         | aldolase A, fructose-bisphosphate                       |
| ALDOB         | aldolase B, fructose-bisphosphate                       |
| ALDOC         | aldolase C, fructose-bisphosphate                       |
| BPGM          | 2,3-bisphosphoglycerate mutase                          |
| ENO1          | enolase 1 (alpha)                                       |
| ENO2          | enolase 2 (gamma, neuronal)                             |
| ENO3          | enolase 3 (beta, muscle)                                |
| FBP1          | fructose-1,6-bisphosphatase 1                           |
| FBP2          | fructose-1,6-bisphosphatase 2                           |
| G6PC          | glucose-6-phosphatase, catalytic subunit                |
| G6PC2         | glucose-6-phosphatase, catalytic, 2                     |
| G6PC3         | glucose 6 phosphatase, catalytic, 3                     |
| GAPDH         | glyceraldehyde-3-phosphate dehydrogenase                |
| GAPDHS        | glyceraldehyde-3-phosphate dehydrogenase, spermatogenic |
| GCK           | glucokinase (hexokinase 4)                              |
| GPI           | glucose-6-phosphate isomerase                           |
| HK1           | hexokinase 1                                            |
| HK2           | hexokinase 2                                            |
| HK3           | hexokinase 3 (white cell)                               |
| MDH1          | malate dehydrogenase 1, NAD (soluble)                   |
| MDH2          | malate dehydrogenase 2, NAD (mitochondrial)             |
| PC            | pyruvate carboxylase                                    |
| PCK1          | phosphoenolpyruvate carboxykinase 1 (soluble)           |
| PFKL          | phosphofructokinase, liver                              |
| PFKM          | phosphofructokinase, muscle                             |
| PFKP          | phosphofructokinase, platelet                           |
| PGAM1         | phosphoglycerate mutase 1 (brain)                       |
| PGAM2         | phosphoglycerate mutase 2 (muscle)                      |
| PGK1          | phosphoglycerate kinase 1                               |
| PGK2          | phosphoglycerate kinase 2                               |
| PKLR          | pyruvate kinase, liver and RBC                          |
| PKM           | pyruvate kinase, muscle                                 |
| TPI1          | triosephosphate isomerase 1                             |
| LDHA          | lactate dehydrogenase A                                 |
| LDHB          | lactate dehydrogenase B                                 |

**Table S6 (related to Figures 7 and S7). Information of the AML patient samples used in the study**

| <b>Sample ID</b> | <b>Age</b> | <b>Sex</b> | <b>Cytogenetics (Karotype)</b>                  | <b>Gene Mutation</b>                      |
|------------------|------------|------------|-------------------------------------------------|-------------------------------------------|
| 20-470           | 70         | F          | Normal                                          | FLT3-ITD; TET2; NPM1                      |
| 18-355           | 71         | F          | Nonclonal aberration: 46, XX,<br>inv(5)(q13q35) | IDH1 (c.394C>T,<br>p.R132C), detected 46% |

**Table S7 (related to Star Methods). List of oligonucleotides**

| <b>Name</b>   | <b>Sequence (5'-3')</b>  | <b>Note</b>             |
|---------------|--------------------------|-------------------------|
| HK1 Forward   | CACATGGAGTCCGAGGTTTATG   | RT-qPCR                 |
| HK1 Reverse   | CGTGAATCCCACAGGTAACCTC   | RT-qPCR                 |
| GPI Forward   | CCGCGTCTGGTATGTCTCC      | RT-qPCR                 |
| GPI Reverse   | CCTGGGTAGTAAAGGTCTTGGA   | RT-qPCR                 |
| PFKL Forward  | GCTGGGCGGCACTATCATT      | RT-qPCR                 |
| PFKL Reverse  | TCAGGTGCGAGTAGGTCCG      | RT-qPCR                 |
| PFKM Forward  | AGCTGCCTACAACCTGGTGA     | RT-qPCR                 |
| PFKM Reverse  | TCCACTCAGAACGGAAGGTGT    | RT-qPCR                 |
| PFKP Forward  | CGCCTACCTCAACGTGGTG      | RT-qPCR & RNA stability |
| PFKP Reverse  | ACCTCCAGAACGAAGGTCCTC    | RT-qPCR & RNA stability |
| ALDOA Forward | CAGGGACAAATGGCGAGACTA    | RT-qPCR                 |
| ALDOA Reverse | GGGGTGTGTTCCCAATCTT      | RT-qPCR                 |
| ALDOC Forward | ATGCCTCACTCGTACCCAG      | RT-qPCR                 |
| ALDOC Reverse | TTTCCACCCCAATTTGGCTCA    | RT-qPCR                 |
| TPI1 Forward  | AGTGACTAATGGGGCTTTTACTG  | RT-qPCR                 |
| TPI1 Reverse  | GCCCAATCAGCTCATCTGACTC   | RT-qPCR                 |
| GAPDH Forward | TCAACGACCACTTTGTCAAGCTCA | RT-qPCR                 |
| GAPDH Reverse | GCTGGTGGTCCAGGGGTCTTACT  | RT-qPCR                 |
| PGK1 Forward  | GAACAAGGTTAAAGCCGAGCC    | RT-qPCR                 |
| PGK1 Reverse  | GTGGCAGATTGACTCCTACCA    | RT-qPCR                 |
| PGAM1 Forward | TCAGCTACCCTCCTGTGAGAG    | RT-qPCR                 |
| PGAM1 Reverse | TACACGTTTCCCTCCTTGAT     | RT-qPCR                 |
| ENO1 Forward  | TGGTGTCTATCGAAGATCCCTT   | RT-qPCR                 |
| ENO1 Reverse  | CCTTGGCGATCCTCTTTGG      | RT-qPCR                 |
| PKM Forward   | ATGTCGAAGCCCCATAGTGAA    | RT-qPCR                 |
| PKM Reverse   | TGGGTGGTGAATCAATGTCCA    | RT-qPCR                 |
| LDHA Forward  | TTGACCTACGTGGCTTGGAAG    | RT-qPCR                 |
| LDHA Reverse  | GGTAACGGAATCGGGCTGAAT    | RT-qPCR                 |
| LDHB Forward  | CCTCAGATCGTCAAGTACAGTCC  | RT-qPCR & RNA stability |
| LDHB Reverse  | ATCACGCGGTGTTTGGGTAAT    | RT-qPCR & RNA stability |
| FTO Forward   | AGAATGTCTGTGACGATGTGG    | RT-qPCR                 |
| FTO Reverse   | GCACTTTCTGTATCGATTGCC    | RT-qPCR                 |

|                               |                                                                                                                                      |                                            |
|-------------------------------|--------------------------------------------------------------------------------------------------------------------------------------|--------------------------------------------|
| PFKP-IP-Forward               | GAGCACAGGATTCCCAAAGA                                                                                                                 | m <sup>6</sup> A IP-RT-qPCR & CLIP-RT-qPCR |
| PFKP-IP-Reverse               | ACTGGGTCAGACACTCCA                                                                                                                   | m <sup>6</sup> A IP-RT-qPCR & CLIP-RT-qPCR |
| LDHB-IP-Forward               | AAGGATGATGAGGTTGCTCAG                                                                                                                | m <sup>6</sup> A IP-RT-qPCR & CLIP-RT-qPCR |
| LDHB-IP-Reverse               | TTCTACAGCCTAGAGCTCACT                                                                                                                | m <sup>6</sup> A IP-RT-qPCR & CLIP-RT-qPCR |
| shYTHDF2-2                    | AGGCTTTGGTTCAGAATAT                                                                                                                  | pLKO.1-shYTHDF2-2 construct                |
| FTO_pCDH_XbaI_Forward         | CATAGAAGATTCTAGAACCACCAT<br>GGATTACAAAGATGACGACGATA<br>AGAAGCGCACCCCGACTGCCGA                                                        | In-Fusion cloning                          |
| FTO_pCDH_NotI_Reverse         | AGATCCTTCGCGGCCGCTAGGGT<br>TTTGCTCCAGAAGC                                                                                            | In-Fusion cloning                          |
| PFKP_pCDH_XbaI_Forward        | CATAGAAGATTCTAGAGCCACCAT<br>GGACGCGGACGACTCCCGGGC                                                                                    | In-Fusion cloning                          |
| PFKP_pCDH_NotI_Reverse        | AGATCCTTCGCGGCCGCTCAGACA<br>CTCCAGGGCTGCACATGTTCC                                                                                    | In-Fusion cloning                          |
| LDHB_pCDH_XbaI_Forward        | CATAGAAGATTCTAGAGCCACCAT<br>GGCAACTCTTAAGGAAAAACT                                                                                    | In-Fusion cloning                          |
| LDHB_3×FLAG_pCDH_NotI_Reverse | AGATCCTTCGCGGCCGCTCACTTG<br>TCATCGTCATCCTTGTAATCGATG<br>TCATGATCTTTATAATCACCGTCA<br>TGGTCTTTGTAGTCGCCGCCCAGG<br>TCTTTTAGGTCCTTCTGGAT | In-Fusion cloning                          |
